# Supplementary material for: Metallocene-coupled cumulenes: a quest for chiral single-molecule magnets
Source: Royal Society of Chemistry journal article supplement (doi:10.1039/d3cp00194f), 2023-01-01
Supplement: d3cp00194f1.pdf [file d3cp00194f1.pdf]

## Supporting Information

# Metalloocene-Coupled Cumulene: A Quest for Chiral Single Molecule Magnet

Soumik Das<sup>†</sup>, Anirban Misra<sup>†\*</sup> and Suranjan Shil<sup>†\*\*</sup>

<sup>†</sup>Department of Chemistry, University of North Bengal, Raja Rammohunpur, Siliguri 734013, West Bengal, India

<sup>‡</sup>Manipal Centre for Natural Sciences (*Centre of Excellence*), Manipal Academy of Higher Education, Planetorium Complex, Madhavnagar, Manipal 576104, Karnataka, India,

Email: \*anirbanmisra@nbu.ac.in

\*\*suranjan.shil@manipal.edu, Phone: +91-9434801574

**Table S1:** Bond angles (in degree) of C<sub>n</sub> chain of [Ni]-C<sub>n</sub>-[Ni] [UB3LYP/6-311++g(d,p)].

| Sys            | ∠C1 - C2 - C3 | C2 - C3 - C4 | C3 - C4 - C5 | C4 - C5 - C6 | C5 - C6 - C7 | C6 - C7 - C8 | C7 - C8 - C9 |
|----------------|---------------|--------------|--------------|--------------|--------------|--------------|--------------|
| C <sub>3</sub> | 179.24        |              |              |              |              |              |              |
| C <sub>5</sub> | 179.60        | 179.88       | 179.60       |              |              |              |              |
| C <sub>7</sub> | 179.24        | 179.88       | 179.87       | 179.87       | 179.29       |              |              |
| C <sub>9</sub> | 179.14        | 179.79       | 179.66       | 179.77       | 179.73       | 179.75       | 179.14       |
| C <sub>4</sub> | 178.59        | 178.59       |              |              |              |              |              |
| C <sub>6</sub> | 179.30        | 179.94       | 179.94       | 179.30       |              |              |              |
| C <sub>8</sub> | 179.39        | 179.86       | 179.94       | 179.94       | 179.89       | 179.39       |              |

**Table S2:** Bond angles (in degree) of C<sub>n</sub> carbon chain of [Cr]-C<sub>n</sub>-[Cr] [UB3LYP/6-311++g(d,p)].

| Sys            | ∠C1 - C2 - C3 | C2 - C3 - C4 | C3 - C4 - C5 | C4 - C5 - C6 | C5 - C6 - C7 | C6 - C7 - C8 | C7 - C8 - C9 |
|----------------|---------------|--------------|--------------|--------------|--------------|--------------|--------------|
| C <sub>3</sub> | 179.04        |              |              |              |              |              |              |
| C <sub>5</sub> | 179.40        | 179.93       | 179.41       |              |              |              |              |
| C <sub>7</sub> | 179.42        | 179.83       | 179.66       | 179.87       | 179.37       |              |              |
| C <sub>9</sub> | 179.36        | 179.68       | 179.52       | 179.62       | 179.63       | 179.93       | 179.30       |
| C <sub>4</sub> | 178.59        | 178.59       |              |              |              |              |              |
| C <sub>6</sub> | 179.35        | 179.95       | 179.95       | 179.39       |              |              |              |
| C <sub>8</sub> | 179.37        | 179.90       | 179.73       | 179.85       | 179.95       | 179.38       |              |

S1

**Table S3:** Bond angles (in degree) of C<sub>n</sub> carbon chain of [Cr]-C<sub>n</sub>-[Ni] [UB3LYP/6-311++g(d,p)]. Numbering is done considering chromocene unit at the left end.

| Sys            | $\angle C1 - C2 - C3$ | $C2 - C3 - C4$ | $C3 - C4 - C5$ | $C4 - C5 - C6$ | $C5 - C6 - C7$ | $C6 - C7 - C8$ | $C7 - C8 - C9$ |
|----------------|-----------------------|----------------|----------------|----------------|----------------|----------------|----------------|
| C <sub>3</sub> | 179.12                |                |                |                |                |                |                |
| C <sub>5</sub> | 179.55                | 179.93         | 179.36         |                |                |                |                |
| C <sub>7</sub> | 179.41                | 179.94         | 179.74         | 179.86         | 179.42         |                |                |
| C <sub>9</sub> | 179.31                | 179.94         | 179.64         | 179.69         | 179.69         | 179.71         | 179.32         |
| C <sub>4</sub> | 178.77                | 178.61         |                |                |                |                |                |
| C <sub>6</sub> | 179.41                | 179.89         | 179.89         | 179.12         |                |                |                |
| C <sub>8</sub> | 179.37                | 179.81         | 179.69         | 179.91         | 179.85         | 179.14         |                |

**Table S4:** Bond lengths (in Å) of C<sub>n</sub> chain of [Ni]-C<sub>n</sub>-[Ni] systems [UMN12SX/6-311++g(d,p)]. C-L and C-R represents bond lengths of nickelocene unit with end carbon atom of the coupler at the left end and nickelocene unit with end carbon atom of the coupler at the right end respectively.

| Sys            | C1-C2 | C2-C3 | C3-C4 | C4-C5 | C5-C6 | C6-C7 | C7-C8 | C8-C9 | Average bond length | C-L   | C-R   |
|----------------|-------|-------|-------|-------|-------|-------|-------|-------|---------------------|-------|-------|
| C <sub>3</sub> | 1.309 | 1.309 |       |       |       |       |       |       | 1.309               | 1.460 | 1.460 |
| C <sub>5</sub> | 1.321 | 1.272 | 1.272 | 1.321 |       |       |       |       | 1.296               | 1.447 | 1.447 |
| C <sub>7</sub> | 1.327 | 1.265 | 1.280 | 1.280 | 1.265 | 1.327 |       |       | 1.291               | 1.440 | 1.440 |
| C <sub>9</sub> | 1.332 | 1.261 | 1.285 | 1.272 | 1.272 | 1.285 | 1.261 | 1.331 | 1.287               | 1.436 | 1.436 |
| C <sub>4</sub> | 1.330 | 1.254 | 1.330 |       |       |       |       |       | 1.305               | 1.443 | 1.443 |
| C <sub>6</sub> | 1.331 | 1.256 | 1.296 | 1.256 | 1.331 |       |       |       | 1.294               | 1.440 | 1.440 |
| C <sub>8</sub> | 1.333 | 1.256 | 1.293 | 1.259 | 1.293 | 1.256 | 1.333 |       | 1.289               | 1.437 | 1.437 |

**Table S5:** Bond lengths (in Å) of C<sub>n</sub> chain of [Cr]-C<sub>n</sub>-[Cr] complexes [UMN12SX/6-311++g(d,p)]. C-L and C-R represents bond lengths of chromocene unit with end carbon atom of the coupler at the left end and chromocene unit with end carbon atom of the coupler at the right end respectively.

| Sys            | C1-C2 | C2-C3 | C3-C4 | C4-C5 | C5-C6 | C6-C7 | C7-C8 | C8-C9 | Average bond length | C-L   | C-R   |
|----------------|-------|-------|-------|-------|-------|-------|-------|-------|---------------------|-------|-------|
| C <sub>3</sub> | 1.308 | 1.308 |       |       |       |       |       |       | 1.308               | 1.463 | 1.463 |
| C <sub>5</sub> | 1.319 | 1.272 | 1.272 | 1.319 |       |       |       |       | 1.296               | 1.453 | 1.453 |
| C <sub>7</sub> | 1.324 | 1.266 | 1.279 | 1.279 | 1.266 | 1.324 |       |       | 1.290               | 1.447 | 1.447 |
| C <sub>9</sub> | 1.328 | 1.263 | 1.284 | 1.273 | 1.273 | 1.284 | 1.263 | 1.328 | 1.287               | 1.443 | 1.443 |
| C <sub>4</sub> | 1.328 | 1.255 | 1.328 |       |       |       |       |       | 1.304               | 1.450 | 1.450 |
| C <sub>6</sub> | 1.329 | 1.257 | 1.294 | 1.257 | 1.329 |       |       |       | 1.293               | 1.445 | 1.445 |
| C <sub>8</sub> | 1.331 | 1.258 | 1.292 | 1.260 | 1.292 | 1.258 | 1.331 |       | 1.289               | 1.443 | 1.443 |

## S2

**Table S6:** Bond lengths (in Å) of C<sub>n</sub> chain of [Cr]-C<sub>n</sub>-[Ni] [UMN12SX/6-311++g(d,p)]. Numbering is done considering chromocene unit at the left end. C-L and C-R represents bond

lengths of chromocene unit with end carbon atom of the coupler at the left end and nickelocene unit with end carbon atom of the coupler at the right end respectively.

| Sys            | C1-C2 | C2-C3 | C3-C4 | C4-C5 | C5-C6 | C6-C7 | C7-C8 | C8-C9 | Average bond length | C-L   | C-R   |
|----------------|-------|-------|-------|-------|-------|-------|-------|-------|---------------------|-------|-------|
| C <sub>3</sub> | 1.311 | 1.312 |       |       |       |       |       |       | 1.311               | 1.468 | 1.463 |
| C <sub>5</sub> | 1.323 | 1.275 | 1.273 | 1.325 |       |       |       |       | 1.299               | 1.456 | 1.452 |
| C <sub>7</sub> | 1.329 | 1.268 | 1.283 | 1.283 | 1.270 | 1.330 |       |       | 1.294               | 1.450 | 1.445 |
| C <sub>9</sub> | 1.334 | 1.264 | 1.288 | 1.276 | 1.276 | 1.288 | 1.264 | 1.334 | 1.291               | 1.445 | 1.441 |
| C <sub>4</sub> | 1.339 | 1.252 | 1.340 |       |       |       |       |       | 1.310               | 1.444 | 1.439 |
| C <sub>6</sub> | 1.348 | 1.250 | 1.312 | 1.250 | 1.349 |       |       |       | 1.302               | 1.435 | 1.429 |
| C <sub>8</sub> | 1.357 | 1.245 | 1.317 | 1.247 | 1.317 | 1.245 | 1.357 |       | 1.298               | 1.427 | 1.421 |

**Table S7:** Bond angles (in degree) of C<sub>n</sub> chain of [Ni]-C<sub>n</sub>-[Ni] complexes [UMN12SX/6-311++g(d,p)].

| Sys            | ∠C1 - C2 - C3 | C2 - C3 - C4 | C3 - C4 - C5 | C4 - C5 - C6 | C5 - C6 - C7 | C6 - C7 - C8 | C7 - C8 - C9 |
|----------------|---------------|--------------|--------------|--------------|--------------|--------------|--------------|
| C <sub>3</sub> | 177.99        |              |              |              |              |              |              |
| C <sub>5</sub> | 179.51        | 179.88       | 179.84       |              |              |              |              |
| C <sub>7</sub> | 179.38        | 179.69       | 179.45       | 179.80       | 179.40       |              |              |
| C <sub>9</sub> | 179.42        | 179.65       | 179.31       | 179.45       | 179.46       | 179.72       | 179.37       |
| C <sub>4</sub> | 179.00        | 179.00       |              |              |              |              |              |
| C <sub>6</sub> | 179.49        | 179.79       | 179.79       | 179.49       |              |              |              |
| C <sub>8</sub> | 179.50        | 179.56       | 179.57       | 179.43       | 179.71       | 179.48       |              |

**Table S8:** Bond angles (in degree) of C<sub>n</sub> chain of [Cr]-C<sub>n</sub>-[Cr] [UMN12SX/6-311++g(d,p)].

| Sys            | ∠C1 - C2 - C3 | C2 - C3 - C4 | C3 - C4 - C5 | C4 - C5 - C6 | C5 - C6 - C7 | C6 - C7 - C8 | C7 - C8 - C9 |
|----------------|---------------|--------------|--------------|--------------|--------------|--------------|--------------|
| C <sub>3</sub> | 177.62        |              |              |              |              |              |              |
| C <sub>5</sub> | 179.52        | 179.87       | 179.20       |              |              |              |              |
| C <sub>7</sub> | 179.12        | 179.65       | 179.30       | 179.56       | 179.30       |              |              |
| C <sub>9</sub> | 179.00        | 179.55       | 179.02       | 179.36       | 179.21       | 179.63       | 179.11       |
| C <sub>4</sub> | 176.55        | 176.56       |              |              |              |              |              |
| C <sub>6</sub> | 179.44        | 179.76       | 179.76       | 179.45       |              |              |              |
| C <sub>8</sub> | 179.31        | 179.56       | 179.92       | 179.85       | 179.54       | 179.29       |              |

### S3

**Table S9:** Bond angles (in degree) of C<sub>n</sub> chain of [Cr]-C<sub>n</sub>-[Ni] [UMN12SX/6-311++g(d,p)]. Numbering is done considering chromocene unit at the left end.

| Sys            | $\angle C1 - C2 - C3$ | $C2 - C3 - C4$ | $C3 - C4 - C5$ | $C4 - C5 - C6$ | $C5 - C6 - C7$ | $C6 - C7 - C8$ | $C7 - C8 - C9$ |
|----------------|-----------------------|----------------|----------------|----------------|----------------|----------------|----------------|
| C <sub>3</sub> | 177.55                |                |                |                |                |                |                |
| C <sub>5</sub> | 179.34                | 179.82         | 179.77         |                |                |                |                |
| C <sub>7</sub> | 179.34                | 179.63         | 179.35         | 179.78         | 179.34         |                |                |
| C <sub>9</sub> | 179.21                | 179.54         | 179.29         | 179.39         | 179.29         | 179.69         | 179.29         |
| C <sub>4</sub> | 176.45                | 174.73         |                |                |                |                |                |
| C <sub>6</sub> | 179.50                | 179.71         | 179.87         | 179.65         |                |                |                |
| C <sub>8</sub> | 179.01                | 179.39         | 179.52         | 179.36         | 179.71         | 179.44         |                |

**Table S10:** Spin-density distribution on Ni and each atom of the coupler of [Ni]-C<sub>n</sub>-[Ni] [UMN12SX/6-311++g(d,p)].

| sys            | Ni1    | Ni2   | C1     | C2     | C3     | C4     | C5     | C6     | C7     | C8     | C9     | Average Spin-density on each atom of coupler |
|----------------|--------|-------|--------|--------|--------|--------|--------|--------|--------|--------|--------|----------------------------------------------|
| C <sub>3</sub> | 1.142  | 1.142 | -0.027 | 0.083  | -0.027 |        |        |        |        |        |        | 0.046                                        |
| C <sub>5</sub> | 1.133  | 1.133 | -0.054 | 0.135  | -0.105 | 0.135  | -0.054 |        |        |        |        | 0.097                                        |
| C <sub>7</sub> | 1.126  | 1.126 | -0.087 | 0.176  | -0.131 | 0.195  | -0.131 | 0.176  | -0.087 |        |        | 0.140                                        |
| C <sub>9</sub> | 1.118  | 1.118 | -0.108 | 0.200  | -0.196 | 0.259  | -0.151 | 0.259  | -0.196 | 0.201  | -0.108 | 0.186                                        |
| C <sub>4</sub> | -1.132 | 1.132 | 0.135  | -0.112 | 0.112  | -0.135 |        |        |        |        |        | 0.124                                        |
| C <sub>6</sub> | -1.121 | 1.121 | 0.147  | -0.128 | 0.197  | -0.197 | 0.128  | -0.147 |        |        |        | 0.157                                        |
| C <sub>8</sub> | -1.115 | 1.115 | 0.180  | -0.160 | 0.206  | -0.171 | 0.172  | -0.206 | 0.161  | -0.180 |        | 0.180                                        |

**Table S11:** Spin-density distribution on Cr and each atom of the coupler of [Cr]-C<sub>n</sub>-[Cr] [UMN12SX/6-311++g(d,p)].

| sys            | Cr1   | Cr2    | C1    | C2     | C3    | C4     | C5    | C6     | C7    | C8     | C9    | Average Spin-density on each atom of coupler |
|----------------|-------|--------|-------|--------|-------|--------|-------|--------|-------|--------|-------|----------------------------------------------|
| C <sub>3</sub> | 2.479 | 2.479  | 0.034 | -0.011 | 0.034 |        |       |        |       |        |       | 0.026                                        |
| C <sub>5</sub> | 2.561 | 2.561  | 0.039 | -0.042 | 0.047 | -0.038 | 0.039 |        |       |        |       | 0.051                                        |
| C <sub>7</sub> | 2.605 | 2.605  | 0.067 | -0.082 | 0.100 | -0.145 | 0.097 | -0.082 | 0.067 |        |       | 0.091                                        |
| C <sub>9</sub> | 2.651 | 2.651  | 0.089 | -0.124 | 0.141 | -0.172 | 0.100 | -0.170 | 0.138 | -0.125 | 0.089 | 0.128                                        |
| C <sub>4</sub> | 2.459 | -2.459 | 0.034 | -0.027 | 0.027 | -0.034 |       |        |       |        |       | 0.031                                        |
| C <sub>6</sub> | 2.639 | -2.639 | 0.089 | -0.056 | 0.107 | -0.107 | 0.056 | -0.088 |       |        |       | 0.084                                        |
| C <sub>8</sub> | 2.691 | -2.691 | 0.139 | -0.116 | 0.156 | -0.127 | 0.127 | -0.156 | 0.117 | -0.139 |       | 0.135                                        |

#### S4

**Table S12:** Spin-density distribution on Cr, Ni and each atom of the coupler of [Cr]-C<sub>n</sub>-[Ni] [UMN12SX/6-311++g(d,p)]. Numbering is done considering chromocene unit at the left end.

| sys | Cr1 | Ni2 | C1 | C2 | C3 | C4 | C5 | C6 | C7 | C8 | C9 | Average |
|-----|-----|-----|----|----|----|----|----|----|----|----|----|---------|
|-----|-----|-----|----|----|----|----|----|----|----|----|----|---------|

|                |        |       |        |        |        |        |        |        |        |        |        |                                      |
|----------------|--------|-------|--------|--------|--------|--------|--------|--------|--------|--------|--------|--------------------------------------|
|                |        |       |        |        |        |        |        |        |        |        |        | Spin-density on each atom of coupler |
| C <sub>3</sub> | -2.535 | 1.135 | -0.013 | 0.029  | -0.052 |        |        |        |        |        |        | 0.031                                |
| C <sub>5</sub> | -2.564 | 1.130 | -0.042 | 0.076  | -0.075 | 0.094  | -0.043 |        |        |        |        | 0.066                                |
| C <sub>7</sub> | -2.604 | 1.124 | -0.069 | 0.119  | -0.132 | 0.194  | -0.121 | 0.120  | -0.071 |        |        | 0.118                                |
| C <sub>9</sub> | -2.654 | 1.120 | -0.092 | 0.158  | -0.170 | 0.219  | -0.125 | 0.204  | -0.158 | 0.161  | -0.099 | 0.154                                |
| C <sub>4</sub> | 2.632  | 1.124 | 0.129  | -0.058 | 0.103  | -0.140 |        |        |        |        |        | 0.108                                |
| C <sub>6</sub> | 2.737  | 1.118 | 0.159  | -0.117 | 0.204  | -0.191 | 0.126  | -0.160 |        |        |        | 0.160                                |
| C <sub>8</sub> | 2.826  | 1.104 | 0.210  | -0.179 | 0.246  | -0.191 | 0.186  | -0.226 | 0.176  | -0.214 |        | 0.204                                |

**Table S13:**  $\langle S^2 \rangle_{HS}$  and  $\langle S^2 \rangle_{BS}$  of the complexes calculated in UB3LYP/6-311++g(d,p) level of theory.

| system         | [Ni]-C <sub>n</sub> -[Ni]  |                            | [Cr]-C <sub>n</sub> -[Cr]  |                            | [Cr]-C <sub>n</sub> -[Ni]  |                            |
|----------------|----------------------------|----------------------------|----------------------------|----------------------------|----------------------------|----------------------------|
|                | $\langle S^2 \rangle_{HS}$ | $\langle S^2 \rangle_{BS}$ | $\langle S^2 \rangle_{HS}$ | $\langle S^2 \rangle_{BS}$ | $\langle S^2 \rangle_{HS}$ | $\langle S^2 \rangle_{BS}$ |
| C <sub>3</sub> | 6.0200                     | 2.0185                     | 6.0714                     | 2.0713                     | 6.0445                     | 2.0448                     |
| C <sub>5</sub> | 6.0356                     | 2.0255                     | 6.1114                     | 2.1041                     | 6.0644                     | 2.0740                     |
| C <sub>7</sub> | 6.0792                     | 2.0405                     | 6.2106                     | 2.1661                     | 6.1031                     | 2.1480                     |
| C <sub>9</sub> | 6.1725                     | 2.0680                     | 6.4318                     | 2.2781                     | 6.1688                     | 2.2973                     |
| C <sub>4</sub> | 6.0195                     | 2.0221                     | 6.1017                     | 2.1354                     | 6.1549                     | 2.0601                     |
| C <sub>6</sub> | 6.0218                     | 2.0694                     | 6.1246                     | 2.2598                     | 6.3378                     | 2.0846                     |
| C <sub>8</sub> | 6.0246                     | 2.1350                     | 6.1622                     | 2.4589                     | 6.5247                     | 2.1982                     |

**Table S14:**  $\langle S^2 \rangle_{HS}$  and  $\langle S^2 \rangle_{BS}$  of the complexes calculated in UMN12SX/6-311++g(d,p) level of theory.

| system         | [Ni]-C <sub>n</sub> -[Ni]  |                            | [Cr]-C <sub>n</sub> -[Cr]  |                            | [Cr]-C <sub>n</sub> -[Ni]  |                            |
|----------------|----------------------------|----------------------------|----------------------------|----------------------------|----------------------------|----------------------------|
|                | $\langle S^2 \rangle_{HS}$ | $\langle S^2 \rangle_{BS}$ | $\langle S^2 \rangle_{HS}$ | $\langle S^2 \rangle_{BS}$ | $\langle S^2 \rangle_{HS}$ | $\langle S^2 \rangle_{BS}$ |
| C <sub>3</sub> | 6.0173                     | 2.0160                     | 6.0839                     | 2.0838                     | 6.0500                     | 2.0501                     |
| C <sub>5</sub> | 6.0275                     | 2.0200                     | 6.1051                     | 2.1017                     | 6.0605                     | 2.0659                     |
| C <sub>7</sub> | 6.0521                     | 2.0271                     | 6.1460                     | 2.1297                     | 6.0770                     | 2.0978                     |
| C <sub>9</sub> | 6.1000                     | 2.0378                     | 6.2160                     | 2.1664                     | 6.0997                     | 2.1561                     |
| C <sub>4</sub> | 6.0180                     | 2.0106                     | 6.0992                     | 2.1008                     | 6.0877                     | 2.0588                     |
| C <sub>6</sub> | 6.0206                     | 2.0373                     | 6.1232                     | 2.1723                     | 6.1678                     | 2.0726                     |
| C <sub>8</sub> | 6.0235                     | 2.0763                     | 6.1480                     | 2.2766                     | 6.3010                     | 2.0943                     |

**Table S15:** SOMO4 ( $\alpha$ ) – LUMO ( $\alpha$ ) energy gaps in electron volt calculated in UB3LYP/6-31g(d,p) level of theory.

| C <sub>n</sub> | [Ni]-C <sub>n</sub> -[Ni] | [Cr]-C <sub>n</sub> -[Cr] | [Cr]-C <sub>n</sub> -[Ni] |
|----------------|---------------------------|---------------------------|---------------------------|
| C <sub>3</sub> | 4.58                      | 4.39                      | 4.37                      |
| C <sub>5</sub> | 3.50                      | 3.19                      | 3.45                      |
| C <sub>7</sub> | 2.90                      | 3.33                      | 2.83                      |
| C <sub>9</sub> | 2.54                      | 2.92                      | 2.41                      |
| C <sub>4</sub> | 2.82                      | 3.19                      | 3.03                      |
| C <sub>6</sub> | 2.29                      | 2.70                      | 2.57                      |
| C <sub>8</sub> | 1.95                      | 2.37                      | 2.28                      |

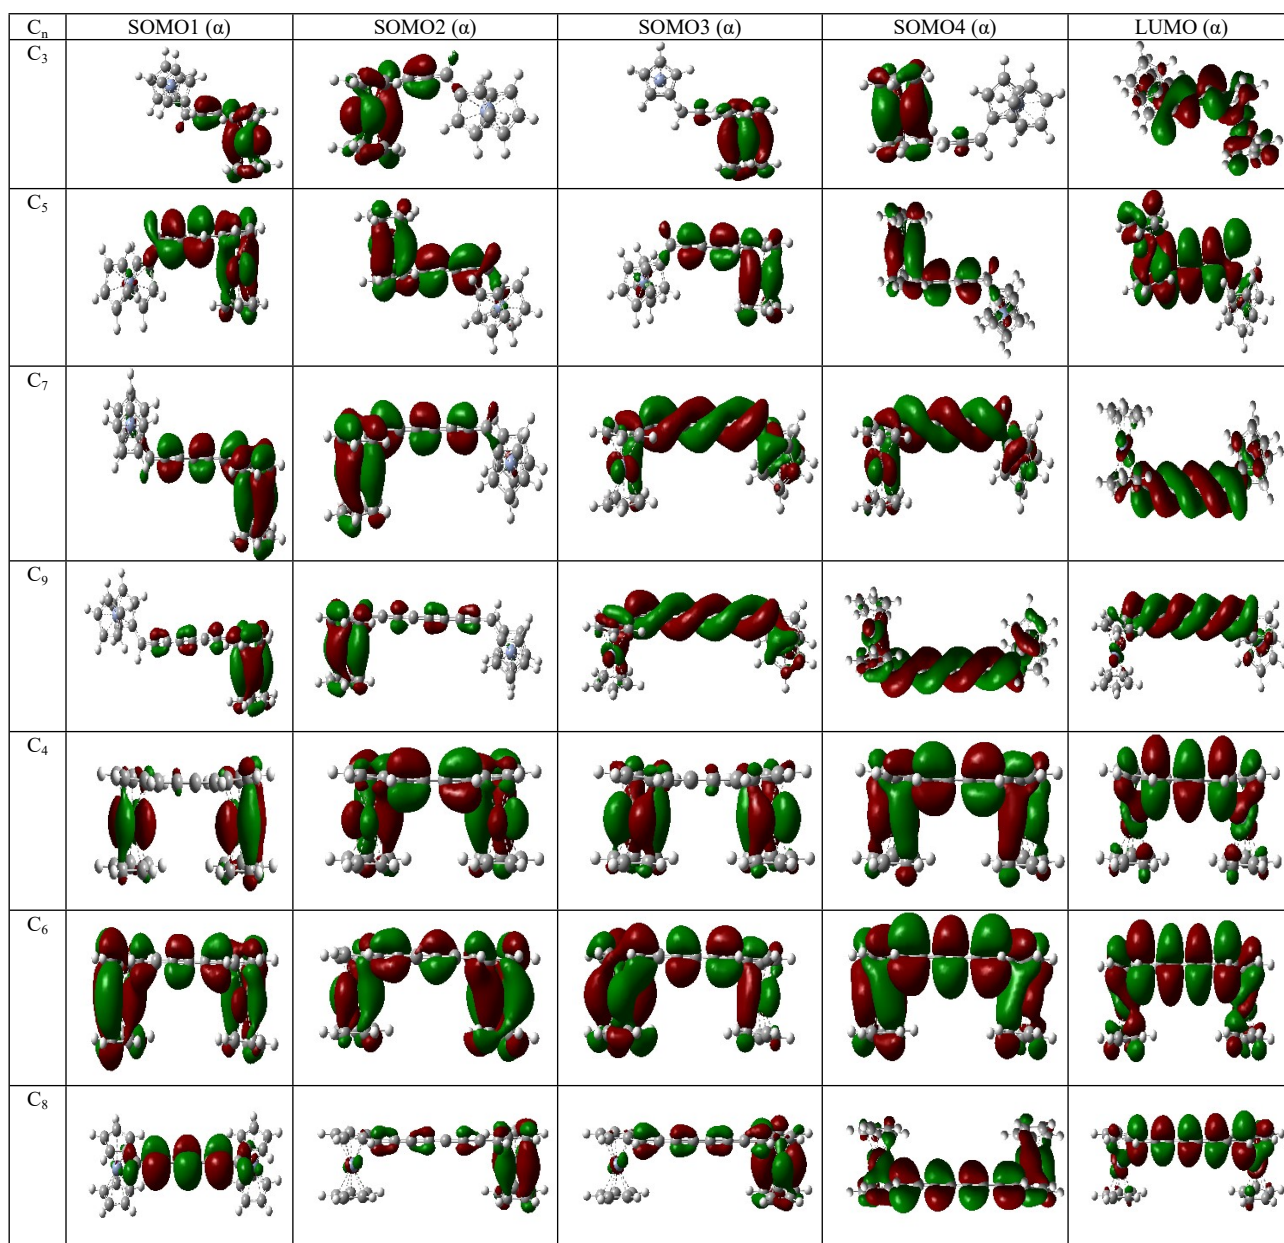

Figure S1: The frontier molecular orbitals of  $[\text{Cr}]-C_n-[\text{Cr}]$  complexes in their high-spin state (quintet) [UB3LYP/6-311++g(d,p)]. The order of energy of the MOs is  $E_{\text{SOMO1}} < E_{\text{SOMO2}} < E_{\text{SOMO3}} < E_{\text{SOMO4}} < E_{\text{LUMO}}$

| $C_n$ | SOMO1 ( $\alpha$ ) | SOMO2 ( $\alpha$ ) | SOMO3 ( $\alpha$ ) | SOMO4 ( $\alpha$ ) | LUMO ( $\alpha$ ) |
|-------|--------------------|--------------------|--------------------|--------------------|-------------------|
| $C_3$ |                    |                    |                    |                    |                   |
| $C_5$ |                    |                    |                    |                    |                   |
| $C_7$ |                    |                    |                    |                    |                   |
| $C_9$ |                    |                    |                    |                    |                   |
| $C_4$ |                    |                    |                    |                    |                   |
| $C_6$ |                    |                    |                    |                    |                   |
| $C_8$ |                    |                    |                    |                    |                   |

Figure S2: The frontier molecular orbitals of  $[\text{Cr}]-C_n-[\text{Ni}]$  complexes in their high-spin state (quintet) [UB3LYP/6-311++g(d,p)]. The order of energy of the MOs is  $E_{\text{SOMO1}} < E_{\text{SOMO2}} < E_{\text{SOMO3}} < E_{\text{SOMO4}} < E_{\text{LUMO}}$

Optimized coordinate of the complexes in UB3LYP/6-311++g(d,p)

[Ni]-C<sub>3</sub>-[Ni]

|   |             |             |             |
|---|-------------|-------------|-------------|
| C | -3.62335586 | -1.82622808 | -1.15366182 |
| C | -2.45946602 | -1.73502939 | -0.32985610 |
| C | -2.90687259 | -1.61693042 | 1.02175683  |
| C | -4.32442045 | -1.65945017 | 1.02869246  |
| C | -4.77035700 | -1.78743390 | -0.31916034 |
| H | -3.62221353 | -1.91818611 | -2.23040402 |
| H | -2.26615535 | -1.51904183 | 1.88547407  |
| H | -4.95587334 | -1.60042970 | 1.90284414  |
| H | -5.79759127 | -1.84594054 | -0.64670565 |
| C | -5.01831373 | 1.97657632  | -0.19570380 |
| C | -4.15184362 | 2.08953578  | 0.92624257  |
| C | -4.21473346 | 1.90665908  | -1.36652367 |
| H | -6.09718153 | 1.93962059  | -0.16340559 |
| C | -2.81182713 | 2.09002922  | 0.44963302  |
| H | -4.45696528 | 2.15377744  | 1.96018579  |
| C | -2.85043509 | 1.97638521  | -0.96802257 |
| H | -4.57586726 | 1.81054383  | -2.37975918 |
| H | -1.92185828 | 2.15424816  | 1.05794505  |
| H | -1.99479090 | 1.94342186  | -1.62605945 |
| C | 4.46967166  | 1.05804216  | -1.80338838 |
| C | 5.55245388  | 1.01998792  | -0.88220001 |
| C | 5.78407566  | -0.33847346 | -0.53174589 |
| C | 4.84388535  | -1.14070847 | -1.23639433 |
| C | 4.03136476  | -0.27731888 | -2.02268422 |
| H | 4.04807679  | 1.94587966  | -2.25094923 |
| H | 6.09653456  | 1.87396241  | -0.50661425 |
| H | 6.53623402  | -0.69755507 | 0.15500198  |



|    |             |             |             |
|----|-------------|-------------|-------------|
| H  | 4.75792184  | -2.21577042 | -1.18115781 |
| H  | 3.21945524  | -0.58264264 | -2.66574161 |
| C  | 1.84480592  | -0.62644808 | 1.11153698  |
| C  | 2.94035094  | -0.66607945 | 2.02787185  |
| C  | 1.64056313  | 0.74257702  | 0.75775118  |
| C  | 3.38894932  | 0.66136630  | 2.25248797  |
| H  | 3.34766454  | -1.56042422 | 2.47736140  |
| C  | 2.58189077  | 1.53334258  | 1.46546300  |
| H  | 0.89221094  | 1.10413932  | 0.06842369  |
| H  | 4.19797844  | 0.95774600  | 2.90331683  |
| H  | 2.67488572  | 2.60801275  | 1.41187864  |
| C  | -1.08076402 | -1.78171771 | -0.81858031 |
| C  | 0.00416587  | -1.77957944 | -0.08039898 |
| C  | 1.08734173  | -1.79459977 | 0.66004431  |
| H  | 1.46650633  | -2.76144584 | 0.99333284  |
| H  | -0.96551360 | -1.83885206 | -1.90164995 |
| Ni | 3.72131501  | 0.20891547  | 0.11829463  |
| Ni | -3.73296638 | 0.14472418  | -0.09051878 |

[Ni]-C<sub>4</sub>-[Ni]

|   |             |             |             |
|---|-------------|-------------|-------------|
| C | -4.27435700 | -1.86657522 | -0.31014074 |
| C | -2.84459073 | -1.78085127 | -0.26588447 |
| C | -2.49296782 | -1.35810199 | 1.05639467  |
| C | -3.68101579 | -1.21697162 | 1.81330591  |
| C | -4.78703194 | -1.53086249 | 0.96638440  |
| H | -4.85556755 | -2.15268788 | -1.17497708 |
| H | -1.48693170 | -1.19145936 | 1.41033832  |
| H | -3.74120385 | -0.92261474 | 2.85064359  |
| H | -5.82859826 | -1.51759411 | 1.25072933  |
| C | -4.25150987 | 2.36048372  | 0.81942289  |
| C | -2.91473497 | 2.30955121  | 0.33677632  |
| C | -5.11877248 | 2.00045092  | -0.24878487 |
| H | -4.55449492 | 2.61896551  | 1.82327572  |
| C | -2.95466222 | 1.91573948  | -1.02952935 |
| H | -2.02456438 | 2.52346143  | 0.90936874  |

|    |             |             |             |
|----|-------------|-------------|-------------|
| C  | -4.31798242 | 1.72556266  | -1.39133736 |
| H  | -6.19570449 | 1.93756979  | -0.19838536 |
| H  | -2.10097129 | 1.77599056  | -1.67573880 |
| H  | -4.67971011 | 1.42086452  | -2.36216911 |
| C  | 2.91444372  | 2.30947721  | 0.33626657  |
| C  | 4.25096489  | 2.36053289  | 0.81960411  |
| C  | 5.11880986  | 2.00056453  | -0.24815008 |
| C  | 4.31863880  | 1.72559347  | -1.39111123 |
| C  | 2.95511583  | 1.91565368  | -1.03001421 |
| H  | 2.02395711  | 2.52333215  | 0.90838786  |
| H  | 4.55340548  | 2.61905073  | 1.82361192  |
| H  | 6.19571984  | 1.93775773  | -0.19718398 |
| H  | 4.68089647  | 1.42089693  | -2.36174608 |
| H  | 2.10177180  | 1.77582645  | -1.67666517 |
| C  | 2.84460098  | -1.78081605 | -0.26591293 |
| C  | 4.27437235  | -1.86647398 | -0.31019511 |
| C  | 2.49297857  | -1.35817783 | 1.05640396  |
| C  | 4.78704954  | -1.53082772 | 0.96634866  |
| H  | 4.85558366  | -2.15249991 | -1.17505926 |
| C  | 3.68103263  | -1.21704748 | 1.81330712  |
| H  | 1.48693836  | -1.19162442 | 1.41037743  |
| H  | 5.82861995  | -1.51752066 | 1.25067619  |
| H  | 3.74122147  | -0.92275786 | 2.85066375  |
| C  | -1.96142024 | -2.08634673 | -1.37057076 |
| C  | 0.62779068  | -2.06962770 | -1.34222613 |
| C  | 1.96142157  | -2.08631252 | -1.37059518 |
| H  | 2.44315607  | -2.36934830 | -2.30493842 |
| H  | -2.44316043 | -2.36940590 | -2.30490419 |
| Ni | 3.77817735  | 0.26647861  | 0.18819899  |
| Ni | -3.77827292 | 0.26651957  | 0.18817386  |
| C  | -0.62778851 | -2.06964245 | -1.34221975 |

[Ni]-C<sub>5</sub>-[Ni]

|   |             |             |             |
|---|-------------|-------------|-------------|
| C | -4.90143238 | -1.68268778 | -1.13606239 |
| C | -3.62243961 | -1.65022965 | -0.49282656 |

|   |             |             |             |
|---|-------------|-------------|-------------|
| C | -3.86202629 | -1.55282385 | 0.91514451  |
| C | -5.26056672 | -1.55372105 | 1.13088668  |
| C | -5.90688156 | -1.63240246 | -0.14092524 |
| H | -5.06289432 | -1.74488145 | -2.20268274 |
| H | -3.09723179 | -1.50016319 | 1.67555051  |
| H | -5.75413677 | -1.50415383 | 2.09017225  |
| H | -6.97285695 | -1.65466548 | -0.31144570 |
| C | -5.55592343 | 2.17291371  | 0.87194591  |
| C | -4.13391220 | 2.18445082  | 0.88387831  |
| C | -5.98411048 | 2.09928528  | -0.48238334 |
| H | -6.19805732 | 2.20520866  | 1.73966914  |
| C | -3.68203517 | 2.11575219  | -0.46326473 |
| H | -3.50613465 | 2.22630387  | 1.76151862  |
| C | -4.82658474 | 2.06421677  | -1.30786685 |
| H | -7.00823150 | 2.06671326  | -0.82357374 |
| H | -2.65207219 | 2.09654209  | -0.78696936 |
| H | -4.81708682 | 2.00386197  | -2.38607058 |
| C | 4.75502742  | 0.82499720  | -2.10988554 |
| C | 5.91032852  | 1.41959112  | -1.53174358 |
| C | 6.74148473  | 0.37652369  | -1.03764142 |
| C | 6.09938042  | -0.86299231 | -1.30950999 |
| C | 4.87019046  | -0.58615713 | -1.97163621 |
| H | 3.92937590  | 1.35177949  | -2.56472913 |
| H | 6.11630378  | 2.47797183  | -1.47064337 |
| H | 7.68950736  | 0.50381748  | -0.53629924 |
| H | 6.47568323  | -1.84254318 | -1.05432028 |
| H | 4.14778616  | -1.31730917 | -2.30264074 |
| C | 3.16407830  | -0.61771513 | 1.38598357  |
| C | 4.43383485  | -0.66940423 | 2.04595816  |
| C | 2.87809607  | 0.76179896  | 1.13226212  |
| C | 4.90613681  | 0.65397251  | 2.21755314  |
| H | 4.93581146  | -1.57167459 | 2.36461261  |
| C | 3.93927307  | 1.54072501  | 1.65183017  |
| H | 1.99413896  | 1.13421412  | 0.63650906  |

|    |             |             |             |
|----|-------------|-------------|-------------|
| H  | 5.83033591  | 0.94306249  | 2.69522080  |
| H  | 4.00696139  | 2.61824319  | 1.62577888  |
| C  | -2.34441654 | -1.71821412 | -1.17609752 |
| C  | 1.15091502  | -1.74727423 | 0.49126803  |
| C  | 2.34561016  | -1.77139868 | 1.06351787  |
| H  | 2.76221288  | -2.74244250 | 1.33260027  |
| H  | -2.38731048 | -1.77727261 | -2.26399318 |
| Ni | 4.78991567  | 0.30067158  | 0.04850752  |
| Ni | -4.79752685 | 0.26379815  | -0.01499805 |
| C  | 0.00037467  | -1.73824255 | -0.05561547 |
| C  | -1.15089989 | -1.72725824 | -0.60085784 |

[Ni]-C<sub>6</sub>-[Ni]

|   |             |             |             |
|---|-------------|-------------|-------------|
| C | -5.53514031 | -1.74669985 | -0.07027005 |
| C | -4.10183496 | -1.70782673 | -0.04815331 |
| C | -3.71698161 | -1.17475195 | 1.22553101  |
| C | -4.88852563 | -0.92160737 | 1.97604322  |
| C | -6.01730969 | -1.27423015 | 1.17265123  |
| H | -6.13729597 | -2.09125998 | -0.89862360 |
| H | -2.70037339 | -1.01201586 | 1.55069197  |
| H | -4.92531008 | -0.53086705 | 2.98214959  |
| H | -7.05363591 | -1.19760799 | 1.46597294  |
| C | -5.37864720 | 2.56125925  | 0.65887809  |
| C | -4.03563822 | 2.43004872  | 0.20982137  |
| C | -6.23746139 | 2.13069006  | -0.39024475 |
| H | -5.69159432 | 2.91738474  | 1.62922832  |
| C | -4.06305024 | 1.91559597  | -1.11602561 |
| H | -3.14936003 | 2.66802559  | 0.77899469  |
| C | -5.42506938 | 1.73163989  | -1.48706444 |
| H | -7.31652038 | 2.10323791  | -0.35633881 |
| H | -3.20227223 | 1.69413987  | -1.72922678 |
| H | -5.77836822 | 1.35154778  | -2.43410831 |
| C | 4.03654284  | 2.43043370  | 0.21085209  |
| C | 5.38009768  | 2.56101996  | 0.65845590  |
| C | 6.23757644  | 2.13010049  | -0.39161199 |

|    |             |             |             |
|----|-------------|-------------|-------------|
| C  | 5.42381433  | 1.73145428  | -1.48756228 |
| C  | 4.06228173  | 1.91601769  | -1.11504099 |
| H  | 3.15099740  | 2.66877996  | 0.78101096  |
| H  | 5.69426852  | 2.91694931  | 1.62848257  |
| H  | 7.31665897  | 2.10214530  | -0.35888316 |
| H  | 5.77589945  | 1.35123097  | -2.43500534 |
| H  | 3.20073603  | 1.69497067  | -1.72731073 |
| C  | 4.10178130  | -1.70780619 | -0.04806357 |
| C  | 5.53508808  | -1.74674548 | -0.07011360 |
| C  | 3.71689263  | -1.17464619 | 1.22557315  |
| C  | 6.01721925  | -1.27422509 | 1.17280641  |
| H  | 6.13725830  | -2.09140153 | -0.89841656 |
| C  | 4.88841510  | -0.92150790 | 1.97612375  |
| H  | 2.70027931  | -1.01184845 | 1.55068700  |
| H  | 7.05353770  | -1.19763713 | 1.46616536  |
| H  | 4.92517473  | -0.53070085 | 2.98220516  |
| C  | -3.24235342 | -2.14160082 | -1.12400253 |
| C  | 1.90756730  | -2.13615234 | -1.10954780 |
| C  | 3.24232129  | -2.14162523 | -1.12391797 |
| H  | 3.73815795  | -2.51386211 | -2.01935497 |
| H  | -3.73816888 | -2.51375846 | -2.01948438 |
| Ni | 4.95782804  | 0.40848278  | 0.22511472  |
| Ni | -4.95782125 | 0.40853069  | 0.22517986  |
| C  | 0.64941258  | -2.13749059 | -1.11000740 |
| C  | -0.64944371 | -2.13749185 | -1.11002622 |
| C  | -1.90759800 | -2.13615722 | -1.10959776 |

[Ni]-C<sub>7</sub>-[Ni]

|   |            |             |             |
|---|------------|-------------|-------------|
| C | 6.18949799 | -1.59279873 | 1.06080232  |
| C | 4.85133279 | -1.57239974 | 0.54538972  |
| C | 4.95286514 | -1.46436487 | -0.88052127 |
| C | 6.32156290 | -1.45148867 | -1.23037820 |
| C | 7.09073224 | -1.52919662 | -0.02564612 |
| H | 6.45456758 | -1.65729755 | 2.10631928  |
| H | 4.11713141 | -1.41639682 | -1.56249528 |

|   |             |             |             |
|---|-------------|-------------|-------------|
| H | 6.71975978  | -1.39634025 | -2.23270121 |
| H | 8.16844103  | -1.54411511 | 0.03907436  |
| C | 6.74574334  | 2.26588984  | -0.92080260 |
| C | 5.32432202  | 2.27658825  | -0.96201167 |
| C | 7.14605291  | 2.19164306  | 0.44217909  |
| H | 7.40568939  | 2.29929481  | -1.77503154 |
| C | 4.84453226  | 2.20584673  | 0.37530062  |
| H | 4.71477596  | 2.31849014  | -1.85241040 |
| C | 5.97170959  | 2.15470483  | 1.24350184  |
| H | 8.16295971  | 2.16007113  | 0.80437031  |
| H | 3.80815513  | 2.18619258  | 0.67784315  |
| H | 5.93966632  | 2.09461035  | 2.32126770  |
| C | -5.78434189 | 1.05306642  | 2.13136608  |
| C | -7.06105852 | 1.45588692  | 1.65165603  |
| C | -7.78853849 | 0.28518671  | 1.30002178  |
| C | -6.96057337 | -0.84136169 | 1.56084858  |
| C | -5.72024154 | -0.36684837 | 2.07394719  |
| H | -4.99638537 | 1.70969396  | 2.46912070  |
| H | -7.41341654 | 2.47280417  | 1.56179701  |
| H | -8.79027378 | 0.25719297  | 0.89751078  |
| H | -7.22431098 | -1.87549061 | 1.39585351  |
| H | -4.87674438 | -0.97663578 | 2.36148562  |
| C | -4.49309052 | -0.53073609 | -1.50324599 |
| C | -5.83203029 | -0.57195361 | -2.01528997 |
| C | -4.17703763 | 0.84737720  | -1.26654998 |
| C | -6.31483976 | 0.75202971  | -2.11859856 |
| H | -6.36966262 | -1.46966787 | -2.28470811 |
| C | -5.28559504 | 1.63227341  | -1.65516705 |
| H | -3.24123274 | 1.21249547  | -0.87058591 |
| H | -7.28485409 | 1.04926078  | -2.48819281 |
| H | -5.34602459 | 2.70971898  | -1.61358898 |
| C | 3.65247984  | -1.65635095 | 1.34473147  |
| C | -2.39798791 | -1.66524660 | -0.83692887 |
| C | -3.65052473 | -1.68290476 | -1.28902565 |

|    |             |             |             |
|----|-------------|-------------|-------------|
| H  | -4.08925580 | -2.65123248 | -1.53041079 |
| H  | 3.79727081  | -1.73240808 | 2.42252207  |
| Ni | -5.96500057 | 0.39062982  | 0.01826442  |
| Ni | 5.97036241  | 0.35830036  | -0.04610095 |
| C  | -1.20586326 | -1.66520648 | -0.40840178 |
| C  | 0.00123829  | -1.66297075 | 0.02696534  |
| C  | 1.20929960  | -1.66156970 | 0.45974667  |
| C  | 2.40262296  | -1.65847640 | 0.88484157  |

[Ni]-C<sub>8</sub>-[Ni]

|   |             |             |             |
|---|-------------|-------------|-------------|
| C | -6.80952894 | -1.63088913 | 0.08832584  |
| C | -5.37509198 | -1.60433143 | 0.10739814  |
| C | -4.98365065 | -0.99266880 | 1.34418832  |
| C | -6.15129033 | -0.68084716 | 2.07623625  |
| C | -7.28511894 | -1.07443810 | 1.29718067  |
| H | -7.41568465 | -2.02273727 | -0.71569393 |
| H | -3.96528076 | -0.81881441 | 1.65793421  |
| H | -6.18365740 | -0.22636846 | 3.05533259  |
| H | -8.32022531 | -0.96975004 | 1.58604754  |
| C | -6.62379746 | 2.71217090  | 0.54289252  |
| C | -5.27813393 | 2.54641496  | 0.11372878  |
| C | -7.47709725 | 2.22130660  | -0.48428505 |
| H | -6.94220595 | 3.12997315  | 1.48649550  |
| C | -5.29823628 | 1.94969282  | -1.17728739 |
| H | -4.39483662 | 2.81483710  | 0.67389569  |
| C | -6.65858054 | 1.75005057  | -1.54729786 |
| H | -8.55651899 | 2.20184837  | -0.45747487 |
| H | -4.43384442 | 1.68656559  | -1.76857114 |
| H | -7.00659417 | 1.31358025  | -2.47171653 |
| C | 5.27813247  | 2.54641663  | 0.11373083  |
| C | 6.62379889  | 2.71217223  | 0.54288572  |
| C | 7.47709175  | 2.22130625  | -0.48429678 |
| C | 6.65856784  | 1.75004939  | -1.54730370 |
| C | 5.29822612  | 1.94969300  | -1.17728470 |
| H | 4.39483894  | 2.81484000  | 0.67390312  |

|    |             |             |             |
|----|-------------|-------------|-------------|
| H  | 6.94221373  | 3.12997550  | 1.48648612  |
| H  | 8.55651364  | 2.20184742  | -0.45749355 |
| H  | 7.00657523  | 1.31357769  | -2.47172412 |
| H  | 4.43383032  | 1.68656549  | -1.76856256 |
| C  | 5.37509600  | -1.60433172 | 0.10740267  |
| C  | 6.80953290  | -1.63088674 | 0.08832953  |
| C  | 4.98365423  | -0.99266783 | 1.34419206  |
| C  | 7.28512260  | -1.07443262 | 1.29718320  |
| H  | 7.41568888  | -2.02273510 | -0.71568998 |
| C  | 6.15129388  | -0.68084271 | 2.07623873  |
| H  | 3.96528417  | -0.81881491 | 1.65793834  |
| H  | 8.32022896  | -0.96974189 | 1.58604910  |
| H  | 6.18366068  | -0.22636211 | 3.05533419  |
| C  | -4.52181172 | -2.11395060 | -0.93643965 |
| C  | 3.18591227  | -2.11265154 | -0.92553291 |
| C  | 4.52181600  | -2.11395304 | -0.93643485 |
| H  | 5.02049034  | -2.54420555 | -1.80410655 |
| H  | -5.02048538 | -2.54420253 | -1.80411195 |
| Ni | 6.21255540  | 0.53600213  | 0.24660621  |
| Ni | -6.21255673 | 0.53600084  | 0.24660716  |
| C  | 1.92710402  | -2.11538680 | -0.92816257 |
| C  | 0.63123435  | -2.11664458 | -0.92879620 |
| C  | -0.63123003 | -2.11664385 | -0.92879732 |
| C  | -1.92709978 | -2.11538481 | -0.92816509 |
| C  | -3.18590793 | -2.11264878 | -0.92553679 |

### [Ni]-C<sub>9</sub>-[Ni]

|   |            |             |             |
|---|------------|-------------|-------------|
| C | 7.46700129 | -1.48695267 | 1.03133007  |
| C | 6.09732891 | -1.48328921 | 0.60024514  |
| C | 6.11042499 | -1.39939698 | -0.83262319 |
| C | 7.45284485 | -1.38950975 | -1.26637945 |
| C | 8.29714260 | -1.44183722 | -0.10867477 |
| H | 7.79682408 | -1.53055717 | 2.05932204  |
| H | 5.23378043 | -1.36710712 | -1.46209971 |
| H | 7.78838794 | -1.35473614 | -2.29226068 |



|   |             |             |             |
|---|-------------|-------------|-------------|
| H | 9.37681611  | -1.45413471 | -0.11179106 |
| C | 7.96826815  | 2.32573085  | -1.02014758 |
| C | 6.54721376  | 2.33857994  | -1.07177336 |
| C | 8.35882281  | 2.28064748  | 0.34710772  |
| H | 8.63436652  | 2.33933423  | -1.87013835 |
| C | 6.05768194  | 2.29739408  | 0.26320933  |
| H | 5.94414887  | 2.36225305  | -1.96723941 |
| C | 7.17878226  | 2.26318547  | 1.14057482  |
| H | 9.37306245  | 2.25525680  | 0.71714791  |
| H | 5.01920071  | 2.28756925  | 0.55894846  |
| H | 7.13869433  | 2.22755623  | 2.21914326  |
| C | -6.83658741 | 1.22246079  | 2.13188331  |
| C | -8.15418214 | 1.58900914  | 1.74234059  |
| C | -8.88745495 | 0.39577067  | 1.49231156  |
| C | -8.02206356 | -0.70842125 | 1.72507979  |
| C | -6.75259333 | -0.19754598 | 2.11915749  |
| H | -6.03549947 | 1.90218314  | 2.38153955  |
| H | -8.53007854 | 2.59679670  | 1.64530215  |
| H | -9.91771247 | 0.33878229  | 1.17358340  |
| H | -8.28046775 | -1.75160048 | 1.61929752  |
| H | -5.87873499 | -0.78425128 | 2.36032640  |
| C | -5.82507859 | -0.50389400 | -1.54518952 |
| C | -7.20414112 | -0.55064931 | -1.94243148 |
| C | -5.48799528 | 0.88003115  | -1.36786617 |
| C | -7.68896638 | 0.77082786  | -2.03969274 |
| H | -7.76477880 | -1.45223739 | -2.14310784 |
| C | -6.62085370 | 1.65899248  | -1.68449822 |
| H | -4.52163972 | 1.25055908  | -1.06020000 |
| H | -8.68446082 | 1.06418965  | -2.33765407 |
| H | -6.67447105 | 2.73746536  | -1.66863018 |
| C | 4.95526025  | -1.55836704 | 1.47002698  |
| C | -3.68594932 | -1.62298042 | -1.01363867 |
| C | -4.97293455 | -1.64904549 | -1.37492844 |
| H | -5.42554575 | -2.62203498 | -1.56556253 |

|    |             |             |             |
|----|-------------|-------------|-------------|
| H  | 5.16334041  | -1.61761015 | 2.53825757  |
| Ni | -7.17388885 | 0.47758794  | 0.06743664  |
| Ni | 7.18219942  | 0.44174974  | -0.10648831 |
| C  | -2.47122549 | -1.61711115 | -0.66944213 |
| C  | -1.23065122 | -1.60658610 | -0.31931042 |
| C  | -0.00511329 | -1.59792618 | 0.03434805  |
| C  | 1.22182467  | -1.58985620 | 0.38313311  |
| C  | 2.46035631  | -1.57831443 | 0.74039036  |
| C  | 3.67484946  | -1.56913508 | 1.08533491  |

[Cr]-C<sub>3</sub>-[Cr]

|   |             |             |             |
|---|-------------|-------------|-------------|
| C | -2.96822200 | -0.79989100 | 2.01727200  |
| C | -1.87876000 | -0.70293600 | 1.10689400  |
| C | -1.70616100 | 0.68351900  | 0.79033500  |
| C | -2.68190600 | 1.43447100  | 1.52633500  |
| C | -3.46364800 | 0.50253200  | 2.28177700  |
| H | -3.36898500 | -1.72366200 | 2.41122300  |
| H | -0.94034900 | 1.08460100  | 0.14411700  |
| H | -2.77700800 | 2.50940400  | 1.54644700  |
| H | -4.28601200 | 0.74409700  | 2.93864700  |
| C | -4.86687200 | 1.40533500  | -1.18922700 |
| C | -3.93168400 | 0.65174000  | -1.97555600 |
| C | -5.76039300 | 0.47233100  | -0.57263300 |
| H | -4.91984600 | 2.48089600  | -1.11697100 |
| C | -4.25895900 | -0.72880700 | -1.83674100 |
| H | -3.13898000 | 1.05706600  | -2.58601300 |
| C | -5.38014400 | -0.83488500 | -0.97757200 |
| H | -6.58056400 | 0.71684000  | 0.08602100  |
| H | -3.72317900 | -1.55514200 | -2.28070700 |
| H | -5.83869200 | -1.75681900 | -0.64978900 |
| C | 4.48448400  | 1.89493200  | 0.86699000  |
| C | 4.98015900  | 1.90065800  | -0.47572600 |
| C | 3.87137700  | 2.02318600  | -1.35431800 |
| C | 2.68976200  | 2.09120800  | -0.57590800 |
| C | 3.05529300  | 2.01286700  | 0.80012500  |

|    |             |             |             |
|----|-------------|-------------|-------------|
| H  | 5.08090600  | 1.85986500  | 1.76580500  |
| H  | 6.01571800  | 1.82232100  | -0.77205800 |
| H  | 3.91661100  | 2.01899100  | -2.43395800 |
| H  | 1.68341500  | 2.15978200  | -0.96236400 |
| H  | 2.37827000  | 2.06096300  | 1.63955200  |
| C  | 2.43833600  | -1.69471600 | -0.37972300 |
| C  | 3.59776400  | -1.81114400 | -1.19620100 |
| C  | 2.87858200  | -1.53520700 | 0.97285400  |
| C  | 4.74963700  | -1.74390900 | -0.36974900 |
| H  | 3.59322700  | -1.90500700 | -2.27335200 |
| C  | 4.31182000  | -1.57649900 | 0.98407900  |
| H  | 2.23176200  | -1.44239200 | 1.83217300  |
| H  | 5.77347500  | -1.81291900 | -0.70598100 |
| H  | 4.94358600  | -1.53997800 | 1.85838100  |
| C  | -1.10863700 | -1.84301700 | 0.59743300  |
| C  | -0.02343100 | -1.77538500 | -0.13523600 |
| C  | 1.05774000  | -1.72789500 | -0.87537100 |
| H  | 0.94280900  | -1.73594700 | -1.95967100 |
| H  | -1.47840700 | -2.82908400 | 0.87981400  |
| Cr | -3.69376200 | 0.17927400  | 0.12317200  |
| Cr | 3.69273800  | 0.15385900  | -0.10409400 |

[Cr]-C<sub>4</sub>-[Cr]

|   |            |             |             |
|---|------------|-------------|-------------|
| C | 2.48327400 | -1.25201500 | 1.05374900  |
| C | 2.84361700 | -1.73648100 | -0.25539400 |
| C | 4.26854100 | -1.87548700 | -0.27031200 |
| C | 4.77786600 | -1.51839800 | 0.99842100  |
| C | 3.68463400 | -1.12909500 | 1.82631500  |
| H | 1.47567700 | -1.08782700 | 1.40275300  |
| H | 4.85476800 | -2.18101500 | -1.12583300 |
| H | 5.82129600 | -1.50739300 | 1.27825100  |
| H | 3.74956800 | -0.82692500 | 2.86064800  |
| C | 4.93746900 | 2.11353700  | 0.00722400  |
| C | 4.41644600 | 1.83004700  | -1.27977700 |
| C | 3.84362800 | 2.29155900  | 0.90335100  |

|    |             |             |             |
|----|-------------|-------------|-------------|
| H  | 5.98477300  | 2.15654500  | 0.26883000  |
| C  | 2.99867700  | 1.82782400  | -1.19889700 |
| H  | 4.99974000  | 1.60932300  | -2.16220100 |
| C  | 2.63274100  | 2.11582900  | 0.15363700  |
| H  | 3.91573600  | 2.54370300  | 1.95049300  |
| H  | 2.31759900  | 1.63055300  | -2.01332600 |
| H  | 1.62745000  | 2.22286500  | 0.53102500  |
| C  | -4.94731800 | 2.09715300  | 0.00982300  |
| C  | -3.86225900 | 2.27517300  | 0.91873900  |
| C  | -2.64344700 | 2.12303000  | 0.17590800  |
| C  | -2.99499700 | 1.85081200  | -1.18266300 |
| C  | -4.41089400 | 1.83827300  | -1.27657700 |
| H  | -5.99740500 | 2.12879200  | 0.26138300  |
| H  | -3.94543400 | 2.51671300  | 1.96749600  |
| H  | -1.64220900 | 2.23357600  | 0.56303400  |
| H  | -2.30488400 | 1.66762600  | -1.99287500 |
| H  | -4.98315900 | 1.62236900  | -2.16740400 |
| C  | -2.83810300 | -1.74201300 | -0.26280100 |
| C  | -2.48198400 | -1.25858000 | 1.04692700  |
| C  | -4.26211900 | -1.87899100 | -0.28405800 |
| C  | -3.68594800 | -1.13308400 | 1.81559700  |
| H  | -1.47530900 | -1.09484800 | 1.39886300  |
| C  | -4.77730900 | -1.52021300 | 0.98221500  |
| H  | -4.84470100 | -2.18232000 | -1.14288600 |
| H  | -3.75367700 | -0.83482400 | 2.85083300  |
| H  | -5.82173700 | -1.51050500 | 1.25808000  |
| C  | 1.96528500  | -2.03103700 | -1.37185000 |
| C  | 0.63254700  | -2.01617000 | -1.34487400 |
| C  | -0.62363700 | -2.01701300 | -1.34666700 |
| C  | -1.95622700 | -2.03389100 | -1.37750600 |
| H  | -2.44025000 | -2.30946100 | -2.31281700 |
| H  | 2.45233000  | -2.30654300 | -2.30563700 |
| Cr | -3.70433600 | 0.25303300  | 0.16543700  |
| Cr | 3.70462500  | 0.25467500  | 0.16740100  |

[Cr]-C<sub>5</sub>-[Cr]

|   |             |             |             |
|---|-------------|-------------|-------------|
| C | -4.40612700 | -0.57137800 | 2.09994100  |
| C | -3.16805400 | -0.54736600 | 1.37735600  |
| C | -2.90261900 | 0.83133300  | 1.04422900  |
| C | -3.96316400 | 1.62616300  | 1.58665500  |
| C | -4.87961600 | 0.75303600  | 2.23551800  |
| H | -4.89986100 | -1.46200500 | 2.46277100  |
| H | -2.02034500 | 1.19358300  | 0.53927400  |
| H | -4.04718300 | 2.70102700  | 1.52840900  |
| H | -5.80524400 | 1.04539600  | 2.71017800  |
| C | -6.57775300 | 0.49615200  | -1.17308600 |
| C | -5.55991100 | 1.37358700  | -1.63699900 |
| C | -6.11121800 | -0.83560600 | -1.29983000 |
| H | -7.52845500 | 0.79476200  | -0.75530500 |
| C | -4.44861300 | 0.57360600  | -2.06018700 |
| H | -5.62119200 | 2.45090500  | -1.67427300 |
| C | -4.79704800 | -0.79959800 | -1.84569900 |
| H | -6.64882400 | -1.72363100 | -1.00021800 |
| H | -3.53190700 | 0.93626000  | -2.49931600 |
| H | -4.17594700 | -1.65508400 | -2.06494800 |
| C | 5.18428000  | 2.17384900  | 0.94088000  |
| C | 5.85102800  | 2.18518300  | -0.31330500 |
| C | 4.87822700  | 2.07629300  | -1.33786600 |
| C | 3.59304000  | 1.99817800  | -0.72771600 |
| C | 3.77827000  | 2.06041100  | 0.69237400  |
| H | 5.65672700  | 2.24417800  | 1.90926600  |
| H | 6.92083500  | 2.22432000  | -0.46027100 |
| H | 5.08100200  | 2.03001800  | -2.39804500 |
| H | 2.64785900  | 1.91763600  | -1.24314100 |
| H | 2.99702700  | 2.06142400  | 1.43696400  |
| C | 3.62900700  | -1.59176400 | -0.43730900 |
| C | 4.91980900  | -1.71031700 | -1.05235000 |
| C | 3.85320300  | -1.40774100 | 0.97664000  |

|    |             |             |             |
|----|-------------|-------------|-------------|
| C  | 5.91047700  | -1.63199200 | -0.04748200 |
| H  | 5.09858700  | -1.82626500 | -2.11212900 |
| C  | 5.26562600  | -1.44286200 | 1.20509600  |
| H  | 3.08158700  | -1.33241600 | 1.72739600  |
| H  | 6.97805200  | -1.66084000 | -0.21211300 |
| H  | 5.75767100  | -1.35184600 | 2.16192600  |
| C  | -2.34956500 | -1.71227100 | 1.07230100  |
| C  | -1.15006900 | -1.69344700 | 0.51340700  |
| C  | 0.00377200  | -1.68831800 | -0.02737100 |
| C  | 1.15815400  | -1.68254800 | -0.56687900 |
| C  | 2.35354200  | -1.67066700 | -1.13485400 |
| H  | 2.40836400  | -1.73984800 | -2.22165000 |
| H  | -2.77317900 | -2.67802700 | 1.34943600  |
| Cr | -4.70066600 | 0.27085100  | 0.04861900  |
| Cr | 4.70218100  | 0.26493900  | -0.03549300 |

[Cr]-C<sub>6</sub>-[Cr]

|   |            |             |             |
|---|------------|-------------|-------------|
| C | 3.68382265 | -1.05794090 | 1.25719652  |
| C | 4.09572444 | -1.63081764 | -0.00520929 |
| C | 5.53410948 | -1.70905841 | 0.02934015  |
| C | 5.98230594 | -1.24749412 | 1.28926556  |
| C | 4.85444703 | -0.84228607 | 2.04688940  |
| H | 2.66216747 | -0.89653108 | 1.56528117  |
| H | 6.15974092 | -2.07232319 | -0.77349763 |
| H | 7.01424576 | -1.16484686 | 1.59919355  |
| H | 4.87975094 | -0.43255115 | 3.04581705  |
| C | 4.85824355 | 2.56686544  | 0.65835444  |
| C | 6.00599360 | 2.30797905  | -0.13250922 |
| C | 3.70522954 | 2.18596297  | -0.09516882 |
| H | 4.85883013 | 2.97024551  | 1.66018466  |
| C | 5.58151868 | 1.76514299  | -1.37291077 |
| H | 7.03129897 | 2.45595927  | 0.17487537  |
| C | 4.15630951 | 1.68739751  | -1.36045168 |
| H | 2.67764207 | 2.28389971  | 0.22010178  |
| H | 6.22786371 | 1.45252311  | -2.17992867 |
| H | 3.52940059 | 1.33466888  | -2.16531785 |

|    |             |             |             |
|----|-------------|-------------|-------------|
| C  | -6.02608308 | 2.26466494  | -0.06658347 |
| C  | -4.92987214 | 2.45310246  | 0.82882133  |
| C  | -3.72151794 | 2.20962902  | 0.09290784  |
| C  | -4.08941406 | 1.87374906  | -1.24560394 |
| C  | -5.50419985 | 1.91047634  | -1.33702079 |
| H  | -7.07300168 | 2.35678908  | 0.18300979  |
| H  | -4.99815582 | 2.76209014  | 1.86077148  |
| H  | -2.71436526 | 2.29743566  | 0.47076661  |
| H  | -3.40992140 | 1.61107939  | -2.04299455 |
| H  | -6.08715341 | 1.66508936  | -2.21317583 |
| C  | -4.09548168 | -1.67592209 | -0.07786940 |
| C  | -3.71103432 | -1.11237550 | 1.19083210  |
| C  | -5.52405897 | -1.74393404 | -0.09088981 |
| C  | -4.90446500 | -0.86926610 | 1.94708269  |
| H  | -2.69532647 | -0.96978124 | 1.52653251  |
| C  | -6.01742039 | -1.26375393 | 1.14383203  |
| H  | -6.12274206 | -2.08109542 | -0.92569029 |
| H  | -4.95343093 | -0.49472902 | 2.95823306  |
| H  | -7.05911777 | -1.18529085 | 1.41870853  |
| C  | 3.25617699  | -2.04797011 | -1.10566376 |
| C  | 1.92028626  | -2.05403774 | -1.10562267 |
| C  | 0.66261886  | -2.05799871 | -1.11866732 |
| C  | -0.63710058 | -2.06273385 | -1.13133197 |
| C  | -1.89529524 | -2.06798856 | -1.14262359 |
| C  | -3.22950392 | -2.07378588 | -1.16980994 |
| H  | -3.72159914 | -2.41862303 | -2.07793365 |
| H  | 3.76915746  | -2.39631747 | -2.00093250 |
| Cr | 4.86455620  | 0.38899767  | 0.21863737  |
| Cr | -4.86636120 | 0.38919702  | 0.20371604  |

[Cr]-C<sub>7</sub>-[Cr]

|   |            |             |             |
|---|------------|-------------|-------------|
| C | 5.82835900 | -0.42714200 | -2.04150500 |
| C | 4.50367500 | -0.42035500 | -1.47434300 |
| C | 4.19074300 | 0.95821100  | -1.17144300 |
| C | 5.29368400 | 1.76241500  | -1.58981400 |

|   |             |             |             |
|---|-------------|-------------|-------------|
| C | 6.29023500  | 0.90778000  | -2.12459700 |
| H | 6.36818600  | -1.30754000 | -2.35985400 |
| H | 3.25558200  | 1.31140600  | -0.76452600 |
| H | 5.36494400  | 2.83657300  | -1.50252000 |
| H | 7.26148000  | 1.21740200  | -2.48320700 |
| C | 7.59030300  | 0.54457800  | 1.46588700  |
| C | 6.52923700  | 1.39073700  | 1.87460600  |
| C | 7.11400200  | -0.79217300 | 1.44475600  |
| H | 8.57964100  | 0.86783400  | 1.17538800  |
| C | 5.37963300  | 0.57723800  | 2.11469800  |
| H | 6.57971400  | 2.46517800  | 1.97219500  |
| C | 5.74390500  | -0.78283800 | 1.84762600  |
| H | 7.68725600  | -1.66273000 | 1.16148700  |
| H | 4.41744400  | 0.92150200  | 2.46208100  |
| H | 5.10370300  | -1.64539800 | 1.95391600  |
| C | -6.22010600 | 2.31891900  | -1.00291000 |
| C | -7.02623300 | 2.27773500  | 0.16175700  |
| C | -6.17852600 | 2.10293800  | 1.28693800  |
| C | -4.82938900 | 2.03841200  | 0.82140500  |
| C | -4.85635300 | 2.17200600  | -0.60523800 |
| H | -6.57887800 | 2.42505600  | -2.01611900 |
| H | -8.10554300 | 2.32480900  | 0.18452500  |
| H | -6.50108600 | 2.02343500  | 2.31469700  |
| H | -3.94683100 | 1.93240000  | 1.43376700  |
| H | -3.99783100 | 2.18588100  | -1.25929900 |
| C | -4.85549600 | -1.50464900 | 0.45532900  |
| C | -6.21146200 | -1.60525300 | 0.93346100  |
| C | -4.93450600 | -1.32925400 | -0.97750500 |
| C | -7.08678900 | -1.54030800 | -0.17672900 |
| H | -6.50331700 | -1.72462000 | 1.96709800  |
| C | -6.31160300 | -1.36762200 | -1.35069600 |
| H | -4.08970000 | -1.25382000 | -1.64497900 |
| H | -8.16622200 | -1.56216400 | -0.13038500 |
| H | -6.70001200 | -1.26731800 | -2.35351000 |



|    |             |             |             |
|----|-------------|-------------|-------------|
| C  | 3.66796000  | -1.58705600 | -1.27108300 |
| C  | 2.40897100  | -1.57861100 | -0.84203000 |
| C  | 1.21158100  | -1.58197200 | -0.42564900 |
| C  | 0.00011900  | -1.58767500 | -0.00267900 |
| C  | -1.21244000 | -1.58639800 | 0.41725800  |
| C  | -2.41032300 | -1.58899500 | 0.83216000  |
| C  | -3.66392000 | -1.58270900 | 1.27685500  |
| H  | -3.82794900 | -1.65516600 | 2.35222300  |
| H  | 4.12369300  | -2.54905600 | -1.50655300 |
| Cr | 5.86349000  | 0.36001300  | 0.01960900  |
| Cr | -5.86581800 | 0.34784400  | -0.02858900 |

[Cr]-C<sub>8</sub>-[Cr]

|   |             |             |             |
|---|-------------|-------------|-------------|
| C | -6.84021100 | -1.52684800 | 0.21168200  |
| C | -5.39379000 | -1.53853100 | 0.17961000  |
| C | -4.95943000 | -0.88853100 | 1.39817100  |
| C | -6.11399400 | -0.56828500 | 2.17083200  |
| C | -7.26126600 | -0.96251800 | 1.44359600  |
| H | -7.48511700 | -1.92301200 | -0.55941900 |
| H | -3.93096500 | -0.74007900 | 1.69064600  |
| H | -6.11543500 | -0.08067700 | 3.13476100  |
| H | -8.28614300 | -0.81059200 | 1.75060200  |
| C | -6.01262700 | 2.76018700  | 0.48172200  |
| C | -4.89075200 | 2.28868200  | -0.26076900 |
| C | -7.18662800 | 2.44516900  | -0.24434200 |
| H | -5.97659200 | 3.25042300  | 1.44356100  |
| C | -5.37969500 | 1.67924000  | -1.45750100 |
| H | -3.85400500 | 2.38372900  | 0.02514000  |
| C | -6.80468500 | 1.77568000  | -1.43996700 |
| H | -8.19934700 | 2.64769500  | 0.07288000  |

|   |             |             |             |
|---|-------------|-------------|-------------|
| H | -4.77784700 | 1.24089500  | -2.23896000 |
| H | -7.47623400 | 1.40781400  | -2.20163200 |
| C | 5.00137800  | 2.38113800  | -0.01070600 |
| C | 6.19678200  | 2.58054300  | 0.75589100  |
| C | 7.31045000  | 2.29455500  | -0.10046600 |
| C | 6.79705900  | 1.92622900  | -1.37701300 |
| C | 5.38322800  | 1.98151400  | -1.32036100 |
| H | 3.98883700  | 2.51679000  | 0.33855600  |
| H | 6.24975500  | 2.93244300  | 1.77479000  |
| H | 8.35423100  | 2.36215600  | 0.16736900  |
| H | 7.38301700  | 1.62343700  | -2.23271100 |
| H | 4.70821200  | 1.71268100  | -2.12010900 |
| C | 5.34011400  | -1.60657600 | 0.07974300  |
| C | 6.76795100  | -1.62107500 | 0.04871500  |
| C | 4.94761400  | -0.96939900 | 1.30333100  |
| C | 7.25875300  | -1.03010400 | 1.24200100  |
| H | 7.36693400  | -2.00141800 | -0.76688000 |
| C | 6.13099700  | -0.62503000 | 2.03007100  |
| H | 3.92819700  | -0.81637600 | 1.62396700  |
| H | 8.29822700  | -0.91900200 | 1.51182200  |
| H | 6.16776600  | -0.18742400 | 3.01591100  |
| C | -4.57791400 | -2.03878100 | -0.88941900 |
| C | 3.14082900  | -2.07545300 | -0.95886400 |
| C | 4.48084800  | -2.07588100 | -0.98589100 |
| H | 4.97389100  | -2.47378200 | -1.87122400 |
| H | -5.09858500 | -2.44452000 | -1.75498900 |
| C | 1.88587600  | -2.07452400 | -0.94704800 |

|    |             |             |             |
|----|-------------|-------------|-------------|
| C  | 0.58227200  | -2.07475200 | -0.93473000 |
| C  | -0.67364000 | -2.07185600 | -0.92223100 |
| C  | -1.97932200 | -2.06279000 | -0.90831900 |
| C  | -3.23124000 | -2.05606600 | -0.89395000 |
| Cr | -6.09349500 | 0.52443400  | 0.23993800  |
| Cr | 6.10463900  | 0.51069800  | 0.21977800  |

[Cr]-C<sub>9</sub>-[Cr]

|   |             |             |             |
|---|-------------|-------------|-------------|
| C | 7.19588800  | -0.34535600 | -1.96683400 |
| C | 5.82070600  | -0.34585000 | -1.52526400 |
| C | 5.47722100  | 1.03340300  | -1.25630900 |
| C | 6.60433100  | 1.84287800  | -1.58440100 |
| C | 7.65097900  | 0.99544900  | -2.02129800 |
| H | 7.76649700  | -1.22224400 | -2.23701300 |
| H | 4.50986500  | 1.38238500  | -0.92836100 |
| H | 6.66057700  | 2.91767900  | -1.49253400 |
| H | 8.64665500  | 1.31277800  | -2.29643800 |
| C | 8.66157700  | 0.64698500  | 1.64659200  |
| C | 7.56098700  | 1.46587200  | 1.99834300  |
| C | 8.21104800  | -0.69892600 | 1.57146500  |
| H | 9.66253500  | 0.99257000  | 1.43180100  |
| C | 6.41427000  | 0.63073500  | 2.14694500  |
| H | 7.58304900  | 2.54005800  | 2.10975000  |
| C | 6.81648600  | -0.71774200 | 1.88403300  |
| H | 8.81829100  | -1.55621700 | 1.32095700  |
| H | 5.42299800  | 0.95522500  | 2.42517400  |
| H | 6.18460200  | -1.59123500 | 1.93656100  |
| C | -7.31574700 | 2.41423500  | -1.08385800 |
| C | -8.21745500 | 2.36228300  | 0.00679700  |
| C | -7.46608300 | 2.17666600  | 1.19919400  |
| C | -6.08209200 | 2.11702800  | 0.84607600  |
| C | -5.99218000 | 2.26272000  | -0.57513900 |
| H | -7.58755000 | 2.52303200  | -2.12362100 |

|    |             |             |             |
|----|-------------|-------------|-------------|
| H  | -9.29456800 | 2.41369600  | -0.06140800 |
| H  | -7.87225200 | 2.09575800  | 2.19664900  |
| H  | -5.25227800 | 2.00700800  | 1.52748600  |
| H  | -5.08269500 | 2.27233900  | -1.15660700 |
| C  | -6.10162700 | -1.43558200 | 0.47683600  |
| C  | -7.49228600 | -1.50128100 | 0.86166100  |
| C  | -6.08242500 | -1.27259900 | -0.96036600 |
| C  | -8.28698500 | -1.44142500 | -0.31010200 |
| H  | -7.85713500 | -1.60897000 | 1.87300100  |
| C  | -7.42927900 | -1.29824200 | -1.42730300 |
| H  | -5.19305600 | -1.21101800 | -1.56893800 |
| H  | -9.36714800 | -1.44805100 | -0.34068200 |
| H  | -7.74522200 | -1.19997400 | -2.45556400 |
| C  | 4.98328400  | -1.51236800 | -1.37500800 |
| C  | 3.69231300  | -1.50542800 | -1.03097000 |
| C  | 2.47443700  | -1.50932600 | -0.69477800 |
| C  | -2.46961600 | -1.51342600 | 0.67619000  |
| C  | -3.68785700 | -1.51561300 | 1.01108200  |
| C  | -4.97337400 | -1.50698400 | 1.37493500  |
| H  | -5.20692700 | -1.57181800 | 2.43755600  |
| H  | 5.45666600  | -2.47384400 | -1.57345300 |
| C  | 1.23150400  | -1.51466800 | -0.35222400 |
| C  | 0.00210600  | -1.51221600 | -0.01037100 |
| C  | -1.22699100 | -1.51804000 | 0.33251900  |
| Cr | -7.05592700 | 0.42669800  | -0.08152600 |
| Cr | 7.05210400  | 0.43879100  | 0.07423600  |

[Cr]-C<sub>3</sub>-[Ni]

|   |             |             |             |
|---|-------------|-------------|-------------|
| C | -3.68399000 | -1.82907500 | -1.17579000 |
| C | -2.52133200 | -1.69869000 | -0.36639400 |
| C | -2.95512300 | -1.52379400 | 0.98552900  |
| C | -4.38777200 | -1.57020400 | 1.00556500  |
| C | -4.83267800 | -1.75578900 | -0.34409700 |
| H | -3.68407400 | -1.93767500 | -2.25153800 |
| H | -2.30395700 | -1.41488200 | 1.83972400  |

|   |             |             |             |
|---|-------------|-------------|-------------|
| H | -5.01444400 | -1.52560300 | 1.88315200  |
| H | -5.85784600 | -1.83606200 | -0.67356600 |
| C | -5.09657400 | 1.87116600  | -0.49952400 |
| C | -4.58974500 | 1.89478100  | 0.83940500  |
| C | -3.99599600 | 1.99423100  | -1.38908900 |
| H | -6.13347200 | 1.77632100  | -0.78600200 |
| C | -3.16309400 | 2.03111000  | 0.75828700  |
| H | -5.17804900 | 1.86789400  | 1.74381900  |
| C | -2.80977700 | 2.09170400  | -0.62123600 |
| H | -4.04928600 | 1.97205700  | -2.46812100 |
| H | -2.47989700 | 2.10032400  | 1.59127100  |
| H | -1.80738800 | 2.16563900  | -1.01707200 |
| C | 4.37831200  | 1.14970100  | -1.76376000 |
| C | 5.47613800  | 1.06017800  | -0.86419700 |
| C | 5.70798200  | -0.31546600 | -0.58893500 |
| C | 4.75281600  | -1.07679900 | -1.31836400 |
| C | 3.93083800  | -0.17095600 | -2.04479400 |
| H | 3.95303500  | 2.06102600  | -2.15737800 |
| H | 6.02996100  | 1.89164200  | -0.45395200 |
| H | 6.47012800  | -0.71229200 | 0.06525300  |
| H | 4.66344500  | -2.15299900 | -1.31779700 |
| H | 3.10699400  | -0.43966600 | -2.68901800 |
| C | 1.79549200  | -0.67557200 | 1.10278000  |
| C | 2.90512200  | -0.76710400 | 1.99822600  |
| C | 1.59164800  | 0.71074300  | 0.82448400  |
| C | 3.36344500  | 0.54503300  | 2.28417800  |
| H | 3.31551900  | -1.68523600 | 2.39370100  |
| C | 2.54768700  | 1.45988800  | 1.55711500  |
| H | 0.83227500  | 1.11096800  | 0.16958000  |
| H | 4.18413100  | 0.80401400  | 2.93634400  |
| H | 2.64390200  | 2.53559000  | 1.55907100  |
| C | -1.14258700 | -1.72948200 | -0.86858300 |
| C | -0.05847200 | -1.76263100 | -0.13205200 |
| C | 1.02634300  | -1.81621800 | 0.60416700  |

|    |             |             |             |
|----|-------------|-------------|-------------|
| H  | 1.39681600  | -2.79967200 | 0.89519700  |
| H  | -1.03355400 | -1.74862100 | -1.95345800 |
| Ni | 3.65886500  | 0.20395500  | 0.12355200  |
| Cr | -3.78894100 | 0.14816500  | -0.11109100 |

[Cr]-C<sub>4</sub>-[Ni]

|   |             |             |             |
|---|-------------|-------------|-------------|
| C | -4.14210846 | -1.87185377 | -0.43252536 |
| C | -2.71143423 | -1.80633220 | -0.34579844 |
| C | -2.39695856 | -1.42334747 | 0.99987725  |
| C | -3.60242700 | -1.30308040 | 1.72844873  |
| C | -4.68861909 | -1.58040268 | 0.83828451  |
| H | -4.70083007 | -2.12169469 | -1.32311994 |
| H | -1.40016710 | -1.27748013 | 1.38765694  |
| H | -3.69007507 | -1.05247819 | 2.77531686  |
| H | -5.73729184 | -1.57559460 | 1.09559389  |
| C | -4.30537649 | 2.29870454  | 0.85551239  |
| C | -2.91258837 | 2.30168320  | 0.56985469  |
| C | -4.99900367 | 1.97006022  | -0.34147365 |
| H | -4.75671128 | 2.49976325  | 1.81588491  |
| C | -2.74367886 | 1.97428443  | -0.80451332 |
| H | -2.12116578 | 2.50764425  | 1.27523715  |
| C | -4.03474993 | 1.77011801  | -1.36766894 |
| H | -6.06966305 | 1.87973286  | -0.45044473 |
| H | -1.80304781 | 1.88879292  | -1.32777941 |
| H | -4.24397001 | 1.50599680  | -2.39366891 |
| C | 2.68048270  | 2.12783571  | -0.04452936 |
| C | 3.82729275  | 2.43664432  | 0.74827239  |
| C | 4.98296935  | 2.18522873  | -0.03157416 |
| C | 4.56927865  | 1.71780667  | -1.30697609 |
| C | 3.14132078  | 1.68132863  | -1.32542696 |
| H | 1.65031111  | 2.23731812  | 0.25825149  |
| H | 3.81838031  | 2.78409311  | 1.77091119  |
| H | 6.00521132  | 2.28853893  | 0.30302948  |
| H | 5.22304226  | 1.43283277  | -2.11813615 |
| H | 2.52083162  | 1.39209801  | -2.15991892 |

|    |             |             |             |
|----|-------------|-------------|-------------|
| C  | 2.96328807  | -1.70014899 | -0.18649035 |
| C  | 4.40092258  | -1.81163232 | -0.14709963 |
| C  | 2.55670342  | -1.20906301 | 1.11170892  |
| C  | 4.84843232  | -1.45646892 | 1.14819263  |
| H  | 5.02493694  | -2.13444838 | -0.96819445 |
| C  | 3.72401160  | -1.08175808 | 1.92439215  |
| H  | 1.53767612  | -1.04120004 | 1.42414458  |
| H  | 5.87893555  | -1.42149826 | 1.47172682  |
| H  | 3.75010790  | -0.74289244 | 2.94963487  |
| C  | -1.80266027 | -2.08642033 | -1.42601273 |
| C  | 0.78747750  | -2.03397254 | -1.32779667 |
| C  | 2.12681114  | -2.02704965 | -1.31776990 |
| H  | 2.64378816  | -2.30488547 | -2.23437645 |
| H  | -2.25445917 | -2.36118636 | -2.37735024 |
| Ni | -3.67800558 | 0.24435139  | 0.19515889  |
| C  | -0.46419219 | -2.05118455 | -1.36183739 |
| Cr | 3.78654807  | 0.27703465  | 0.18411867  |

[Cr]-C<sub>5</sub>-[Ni]

|   |             |             |             |
|---|-------------|-------------|-------------|
| C | -5.04859800 | -1.64847600 | -1.14643400 |
| C | -3.76054600 | -1.57067200 | -0.52110300 |
| C | -3.98875000 | -1.44774800 | 0.89847500  |
| C | -5.40291700 | -1.47711700 | 1.11929000  |
| C | -6.04353600 | -1.60346000 | -0.14414100 |
| H | -5.22315000 | -1.71341200 | -2.21129500 |
| H | -3.21994800 | -1.41504700 | 1.65515500  |
| H | -5.89847800 | -1.42661400 | 2.07722800  |
| H | -7.11039900 | -1.61452900 | -0.31512900 |
| C | -5.31489800 | 2.12667600  | 1.02985200  |
| C | -3.90348400 | 2.02812700  | 0.80163800  |
| C | -5.95710900 | 2.21046600  | -0.23560500 |
| H | -5.80555600 | 2.14628500  | 1.99142400  |
| C | -3.69189900 | 2.04807000  | -0.61547000 |
| H | -3.13608100 | 1.98759000  | 1.55939400  |
| C | -4.96385300 | 2.16150100  | -1.24468400 |

|    |             |             |             |
|----|-------------|-------------|-------------|
| H  | -7.02363700 | 2.25982900  | -0.40184400 |
| H  | -2.73732400 | 1.99337100  | -1.11692900 |
| H  | -5.14548900 | 2.17327500  | -2.30969800 |
| C  | 4.63326800  | 0.88693600  | -2.07937600 |
| C  | 5.79801100  | 1.44311900  | -1.48220900 |
| C  | 6.61573000  | 0.37062500  | -1.03056600 |
| C  | 5.95587600  | -0.84865800 | -1.34773600 |
| C  | 4.72926100  | -0.52988300 | -1.99549500 |
| H  | 3.81383700  | 1.44199300  | -2.51127500 |
| H  | 6.01875600  | 2.49546900  | -1.38134100 |
| H  | 7.56654100  | 0.46568100  | -0.52735200 |
| H  | 6.31896000  | -1.84232800 | -1.13083100 |
| H  | 3.99573600  | -1.23787900 | -2.35143600 |
| C  | 3.03860300  | -0.67051800 | 1.36571400  |
| C  | 4.30881900  | -0.75421700 | 2.02109400  |
| C  | 2.76145900  | 0.71888600  | 1.16225400  |
| C  | 4.79062000  | 0.55937100  | 2.23889100  |
| H  | 4.80515200  | -1.67063000 | 2.30652600  |
| C  | 3.82910600  | 1.47192700  | 1.70719700  |
| H  | 1.87924900  | 1.11442200  | 0.68153800  |
| H  | 5.71790100  | 0.82492300  | 2.72422600  |
| H  | 3.90433500  | 2.54921000  | 1.71870500  |
| C  | -2.48303600 | -1.62929700 | -1.21691300 |
| C  | 1.01525500  | -1.75308300 | 0.43617500  |
| C  | 2.21159600  | -1.80690600 | 1.00251100  |
| H  | 2.62388700  | -2.78962600 | 1.23319000  |
| H  | -2.53345800 | -1.65185400 | -2.30585700 |
| Ni | 4.66596300  | 0.28072300  | 0.05809200  |
| C  | -0.13679900 | -1.71514100 | -0.10517300 |
| C  | -1.28999100 | -1.67554400 | -0.64675700 |
| Cr | -4.81962200 | 0.27832200  | -0.03498100 |

[Cr]-C<sub>6</sub>-[Ni]

|   |             |             |             |
|---|-------------|-------------|-------------|
| C | -5.37622200 | -1.77005500 | -0.19875300 |
| C | -3.93959400 | -1.74910400 | -0.14117800 |



|   |             |             |             |
|---|-------------|-------------|-------------|
| C | -3.58802800 | -1.24133100 | 1.15676200  |
| C | -4.77254600 | -1.01600900 | 1.88851100  |
| C | -5.88689400 | -1.34331500 | 1.04463500  |
| H | -5.95963500 | -2.08489000 | -1.05206400 |
| H | -2.57922800 | -1.08981600 | 1.51051000  |
| H | -4.83333700 | -0.66832000 | 2.90919600  |
| H | -6.92933800 | -1.28388600 | 1.31990400  |
| C | -5.32686000 | 2.52335300  | 0.75111900  |
| C | -3.96516300 | 2.42336700  | 0.35510000  |
| C | -6.13541000 | 2.12359800  | -0.34870200 |
| H | -5.68460300 | 2.83766300  | 1.72050600  |
| C | -3.92976000 | 1.95989700  | -0.98991100 |
| H | -3.10666600 | 2.64838500  | 0.97040800  |
| C | -5.27303400 | 1.77643400  | -1.42487100 |
| H | -7.21456200 | 2.08319700  | -0.36176700 |
| H | -3.04159100 | 1.77509100  | -1.57556800 |
| H | -5.58160200 | 1.43057900  | -2.40028300 |
| C | 3.78145600  | 2.20635800  | -0.22002700 |
| C | 4.89913600  | 2.64384500  | 0.54977700  |
| C | 6.07781700  | 2.35352200  | -0.17875100 |
| C | 5.70392700  | 1.73339600  | -1.40295200 |
| C | 4.27856200  | 1.64286200  | -1.43651500 |
| H | 2.74271600  | 2.29605300  | 0.06008500  |
| H | 4.85709000  | 3.09565700  | 1.53002600  |
| H | 7.08864000  | 2.53819200  | 0.15510700  |
| H | 6.38095800  | 1.39331500  | -2.17263800 |
| H | 3.68211600  | 1.23892600  | -2.24031000 |
| C | 4.25129000  | -1.63189600 | 0.05361800  |
| C | 5.69708500  | -1.63741600 | 0.10317200  |
| C | 3.80903200  | -1.03239800 | 1.29527100  |
| C | 6.10957900  | -1.13366400 | 1.36348900  |
| H | 6.34705200  | -2.00543900 | -0.67758900 |
| C | 4.95798400  | -0.75931000 | 2.09490000  |
| H | 2.77867200  | -0.88900500 | 1.58328000  |

|    |             |             |             |
|----|-------------|-------------|-------------|
| H  | 7.13244800  | -1.00575000 | 1.68781600  |
| H  | 4.95354400  | -0.31561700 | 3.07983700  |
| C  | -3.06255000 | -2.16009700 | -1.19215700 |
| C  | 2.09544800  | -2.10188400 | -1.05937800 |
| C  | 3.44325100  | -2.08639700 | -1.04223400 |
| H  | 3.97075200  | -2.45557500 | -1.91966800 |
| H  | -3.52899400 | -2.52169000 | -2.10685300 |
| Ni | -4.85079800 | 0.38721600  | 0.24001300  |
| C  | 0.84601500  | -2.11299600 | -1.08766400 |
| C  | -0.46550400 | -2.12725200 | -1.11722900 |
| C  | -1.71468300 | -2.13881300 | -1.14424100 |
| Cr | 4.96924600  | 0.41969700  | 0.21787300  |

[Cr]-C<sub>7</sub>-[Ni]

|   |             |             |             |
|---|-------------|-------------|-------------|
| C | 6.04349100  | -1.73145600 | 0.84694000  |
| C | 4.70547500  | -1.63287800 | 0.34171700  |
| C | 4.80597700  | -1.35563400 | -1.06069000 |
| C | 6.17502200  | -1.31579100 | -1.41053300 |
| C | 6.94450100  | -1.54675000 | -0.22694500 |
| H | 6.30928300  | -1.92472400 | 1.87629600  |
| H | 3.96966400  | -1.21670000 | -1.72935100 |
| H | 6.57217900  | -1.14357600 | -2.39992400 |
| H | 8.02209300  | -1.58020000 | -0.16707600 |
| C | 6.61421900  | 2.33702600  | -0.65870400 |
| C | 5.19240700  | 2.36130200  | -0.67338800 |
| C | 7.03650700  | 2.09436800  | 0.67777600  |
| H | 7.26012600  | 2.47044300  | -1.51390000 |
| C | 4.73441400  | 2.13091500  | 0.65349600  |
| H | 4.56840700  | 2.51500000  | -1.54120100 |
| C | 5.87533900  | 1.96708100  | 1.48903200  |
| H | 8.05901800  | 2.01230000  | 1.01546800  |
| H | 3.70302200  | 2.07962000  | 0.96908000  |
| H | 5.86074700  | 1.77553400  | 2.55173200  |
| C | -5.56766700 | 0.26195600  | 2.17464200  |
| C | -6.69996000 | 1.12142900  | 2.03786900  |

|    |             |             |             |
|----|-------------|-------------|-------------|
| C  | -7.76264700 | 0.36626600  | 1.48234000  |
| C  | -7.30441800 | -0.95979900 | 1.26659300  |
| C  | -5.94371000 | -1.03528300 | 1.69521700  |
| H  | -4.60929900 | 0.53337100  | 2.59044900  |
| H  | -6.73730500 | 2.16961700  | 2.29574000  |
| H  | -8.74024900 | 0.74737300  | 1.22407700  |
| H  | -7.88324900 | -1.76730800 | 0.84289500  |
| H  | -5.31855100 | -1.91519500 | 1.68401600  |
| C  | -4.62513600 | -0.19123800 | -1.50578800 |
| C  | -5.93905400 | -0.10643300 | -2.09153700 |
| C  | -4.31041700 | 1.12674400  | -1.00202500 |
| C  | -6.39260700 | 1.22986700  | -1.98805100 |
| H  | -6.47696900 | -0.92737000 | -2.54374400 |
| C  | -5.40159300 | 1.99052600  | -1.31827400 |
| H  | -3.38143200 | 1.41107000  | -0.53189000 |
| H  | -7.35564700 | 1.59546800  | -2.31456300 |
| H  | -5.46956300 | 3.04101800  | -1.07676700 |
| C  | 3.50509100  | -1.79746800 | 1.12968200  |
| C  | -2.54560800 | -1.44404700 | -1.02097900 |
| C  | -3.79843300 | -1.38121100 | -1.46049600 |
| H  | -4.25553200 | -2.29700800 | -1.83578100 |
| H  | 3.65209200  | -2.00694700 | 2.18945600  |
| Ni | 5.83851900  | 0.34080500  | -0.01112500 |
| C  | -1.35277900 | -1.51613700 | -0.59718800 |
| C  | -0.14613100 | -1.59009900 | -0.16940100 |
| C  | 1.06204200  | -1.65846300 | 0.25793500  |
| C  | 2.25575800  | -1.72598400 | 0.67696600  |
| Cr | -6.00782700 | 0.37053500  | 0.06038600  |

[Cr]-C<sub>8</sub>-[Ni]

|   |             |             |             |
|---|-------------|-------------|-------------|
| C | -6.62283100 | -1.65895700 | -0.03865700 |
| C | -5.18271800 | -1.65956100 | 0.00717100  |
| C | -4.81446800 | -1.06059800 | 1.26417800  |
| C | -5.98757000 | -0.77244900 | 1.98712300  |
| C | -7.11575700 | -1.14348200 | 1.17476600  |

|   |             |             |             |
|---|-------------|-------------|-------------|
| H | -7.21769900 | -2.02391900 | -0.86356500 |
| H | -3.80083400 | -0.89765800 | 1.59850800  |
| H | -6.03577700 | -0.35768900 | 2.98311700  |
| H | -8.15461300 | -1.05387000 | 1.45542600  |
| C | -6.54034200 | 2.68808000  | 0.64153500  |
| C | -5.17954800 | 2.55331500  | 0.25349100  |
| C | -7.35200400 | 2.22408900  | -0.43091000 |
| H | -6.89590100 | 3.06720400  | 1.58829100  |
| C | -5.14727700 | 2.00299600  | -1.05855800 |
| H | -4.31928200 | 2.81083100  | 0.85336800  |
| C | -6.49219500 | 1.80217400  | -1.48192600 |
| H | -8.43143900 | 2.19134600  | -0.44207000 |
| H | -4.26020600 | 1.77605700  | -1.63091500 |
| H | -6.80308400 | 1.39722000  | -2.43356300 |
| C | 4.97403000  | 2.28946600  | -0.34690900 |
| C | 6.07088600  | 2.80230600  | 0.40490800  |
| C | 7.26531000  | 2.48817000  | -0.28710500 |
| C | 6.91876900  | 1.77755500  | -1.47093200 |
| C | 5.49720400  | 1.65708200  | -1.51452800 |
| H | 3.93005900  | 2.36948600  | -0.08315000 |
| H | 6.00499200  | 3.31947300  | 1.35095800  |
| H | 8.26743200  | 2.72147700  | 0.04219000  |
| H | 7.61142800  | 1.40102100  | -2.20912200 |
| H | 4.91902500  | 1.18152700  | -2.29213200 |
| C | 5.54824300  | -1.54300600 | 0.22767400  |
| C | 6.99514200  | -1.47779800 | 0.27119200  |
| C | 5.08631800  | -0.85685600 | 1.41774700  |
| C | 7.38779500  | -0.86497800 | 1.49117100  |
| H | 7.65981600  | -1.88004400 | -0.47973200 |
| C | 6.22236400  | -0.48202000 | 2.19363800  |
| H | 4.05090800  | -0.72377400 | 1.69293600  |
| H | 8.40462700  | -0.67667600 | 1.80483800  |
| H | 6.19883400  | 0.03586100  | 3.14147000  |
| C | -4.32362900 | -2.15749900 | -1.00917600 |

|    |             |             |             |
|----|-------------|-------------|-------------|
| C  | 3.40266100  | -2.10485900 | -0.84967700 |
| C  | 4.75956000  | -2.08347100 | -0.83157800 |
| H  | 5.29174800  | -2.51623300 | -1.67585800 |
| H  | -4.79584900 | -2.58058000 | -1.89380800 |
| Ni | -6.07871800 | 0.52162700  | 0.26523500  |
| C  | 2.15774900  | -2.11361400 | -0.87451800 |
| C  | 0.84111400  | -2.12705100 | -0.89955900 |
| C  | -0.40575700 | -2.13325500 | -0.92152500 |
| C  | -1.72216800 | -2.13952600 | -0.94685600 |
| C  | -2.96712700 | -2.14476100 | -0.96762800 |
| Cr | 6.20572500  | 0.55268500  | 0.23495600  |

[Cr]-C<sub>9</sub>-[Ni]

|   |             |             |             |
|---|-------------|-------------|-------------|
| C | 7.30999000  | -1.65640500 | 0.76569900  |
| C | 5.93940100  | -1.56896600 | 0.35001300  |
| C | 5.94551000  | -1.26439700 | -1.05159900 |
| C | 7.28699400  | -1.19994400 | -1.48801500 |
| C | 8.13564300  | -1.44108800 | -0.35988900 |
| H | 7.64458800  | -1.86374200 | 1.77195600  |
| H | 5.06576500  | -1.12543200 | -1.66194800 |
| H | 7.61723100  | -1.00661100 | -2.49787900 |
| H | 9.21514700  | -1.46198200 | -0.37147700 |
| C | 7.80101400  | 2.43347700  | -0.66867300 |
| C | 6.37913300  | 2.45727700  | -0.67621800 |
| C | 8.22985800  | 2.17074900  | 0.66206100  |
| H | 8.44277100  | 2.58063500  | -1.52474200 |
| C | 5.92750300  | 2.20588400  | 0.64896700  |
| H | 5.75097000  | 2.62394700  | -1.53861300 |
| C | 7.07263700  | 2.03002700  | 1.47665300  |
| H | 9.25401800  | 2.08450500  | 0.99363600  |
| H | 4.89772300  | 2.14984600  | 0.96897500  |
| H | 7.06297600  | 1.82273800  | 2.53643700  |
| C | -6.62655500 | 0.26734900  | 2.21744100  |
| C | -7.77432900 | 1.11417500  | 2.18765400  |
| C | -8.86326800 | 0.36475400  | 1.67877800  |

|    |             |             |             |
|----|-------------|-------------|-------------|
| C  | -8.40484600 | -0.94781500 | 1.38647700  |
| C  | -7.01710300 | -1.01776500 | 1.72081500  |
| H  | -5.64382700 | 0.54049700  | 2.57084200  |
| H  | -7.80461200 | 2.15345900  | 2.48034800  |
| H  | -9.86098800 | 0.74050300  | 1.50305200  |
| H  | -9.00228000 | -1.75039300 | 0.97974400  |
| H  | -6.38269700 | -1.88714800 | 1.63832400  |
| C  | -5.95804400 | -0.06106300 | -1.55349000 |
| C  | -7.32199100 | 0.02096800  | -2.01943900 |
| C  | -5.61935100 | 1.24841100  | -1.04108700 |
| C  | -7.77702300 | 1.35079800  | -1.84547600 |
| H  | -7.88626700 | -0.79338400 | -2.45064700 |
| C  | -6.74053800 | 2.10546000  | -1.24404800 |
| H  | -4.65903900 | 1.53226900  | -0.63827800 |
| H  | -8.76704900 | 1.71424400  | -2.08086800 |
| H  | -6.79966000 | 3.14763700  | -0.96652000 |
| C  | 4.79772800  | -1.76421500 | 1.20748500  |
| C  | -3.83855000 | -1.29883700 | -1.24141300 |
| C  | -5.12271600 | -1.23947900 | -1.59634900 |
| H  | -5.59370600 | -2.15063400 | -1.96500300 |
| H  | 5.01256500  | -1.99313200 | 2.25139400  |
| Ni | 7.02973400  | 0.42859300  | -0.04555700 |
| C  | -2.62427700 | -1.36814100 | -0.89756400 |
| C  | -1.38649300 | -1.43900700 | -0.54926500 |
| C  | -0.16121700 | -1.50249800 | -0.19992500 |
| C  | 1.06477100  | -1.57158900 | 0.14539100  |
| C  | 2.30231000  | -1.63474400 | 0.49648100  |
| C  | 3.51811200  | -1.69786200 | 0.83489000  |
| Cr | -7.21841600 | 0.43202200  | 0.13328100  |
